1 **Airway tissue stem cells reutilize the embryonic proliferation regulator, Tgf $\beta$ -Id2**

2 **axis, for tissue regeneration**

3

4 Hirofumi Kiyokawa<sup>1</sup>, Akira Yamaoka<sup>1</sup>, Chisa Matsuoka<sup>1</sup>, Tomoko Tokuhara<sup>2</sup>, Takaya

5 Abe<sup>2</sup>, Mitsuru Morimoto<sup>1,\*</sup>

6 *1 Laboratory for Lung Development and Regeneration, RIKEN Center for Biosystems*

7 *Dynamics Research, Kobe 650-0047, Japan*

8 *2 Laboratory for Animal Resources and Genetic Engineering, RIKEN Center for*

9 *Biosystems Dynamics Research, Kobe 650-0047, Japan*

10 \*Correspondence: [mitsuru.morimoto@riken.jp](mailto:mitsuru.morimoto@riken.jp)

11

## 12 **Summary**

13 During development, quiescent basal stem cells are derived from proliferative primordial  
14 progenitors through the cell cycle slowdown. In contrast, quiescent basal cells contribute  
15 to tissue repair during adult tissue regeneration by shifting from slow-cycling to  
16 proliferating and subsequently back to slow-cycling. Although sustained basal cell  
17 proliferation results in tumorigenesis, the molecular mechanisms regulating these  
18 transitions remain unknown. Using temporal single-cell transcriptomics of developing  
19 murine airway progenitors and *in vivo* genetic validation experiments, we found that Tgf $\beta$   
20 signaling slowed down cell cycle by inhibiting *Id2* expression in airway progenitors and  
21 contributed to the specification of slow-cycling basal cell population during development.  
22 In adult tissue regeneration, reduced Tgf $\beta$  signaling restored *Id2* expression and initiated  
23 epithelial regeneration. *Id2* overexpression and *Tgfbr2* knockout enhanced epithelial  
24 proliferation; however, persistent *Id2* expression in basal cells drove hyperplasia at a rate  
25 that resembled a precancerous state. Together, the Tgf $\beta$ -*Id2* axis commonly regulates the  
26 proliferation transitions in airway basal cells during development and regeneration, and  
27 its fine-tuning is critical for normal regeneration while avoiding basal cell hyperplasia.

28

## 29 **Introduction**

30 Tissue stem cells contribute to homeostasis through the strict regulation of cell  
31 proliferation (Leach and Morrisey, 2018; Yanger and Stanger, 2011). Under normal  
32 conditions, most of the tissue stem cells are maintained in the quiescent or slow-cycling  
33 state by suppression of cell cycle progression (Furutachi, et al., 2015; Desai, et al., 2014;  
34 Cheung and Rando, 2013). However, following injury, they undergo self-renewal by re-  
35 entering the cell cycle for tissue regeneration (Cheung and Rando, 2013; Yanger and  
36 Stanger, 2011). The precise regulation of the transitions of the stem cell population  
37 between the quiescent/slow-cycling and active cell cycle is essential for tissue  
38 homeostasis; the dysregulation of this transition is related to pathological disorders, such  
39 as cancer (Feitelson, et al., 2015; Lapouge, et al., 2011; Barker, et al., 2009). However,  
40 the molecular mechanism regulating the stem cells' transitions to the proliferation mode  
41 remains unknown. Thus, understanding such molecular mechanism is important for stem  
42 cell biology and human health.

43 Quiescent tissue stem cells are selected and segregated from the primordial progenitors  
44 during tissue development. It has been reported that the tissue stem cells of hair follicles  
45 and the brain enter the quiescent/slow-cycling state as they differentiate from the  
46 primordial progenitors during organogenesis (Furutachi, et al., 2015; Shyer, et al., 2015;

47 Gancz, et al., 2011; Nowak, et al., 2008; Mikkola and Orkin, 2006). These studies have  
48 demonstrated the importance of cell cycle slowdown for the specific quiescent tissue stem  
49 population at the early stage of tissue development. For example, in the development hair  
50 follicle stem cells, slow-cycling cells expressing stem cell markers appear in the  
51 primordial surface ectoderm. This population differentiates into mature quiescent hair  
52 follicle stem cells at the later stage. The ablation of this slow-cycling population  
53 compromised epidermal wound repair due to the decreased number of tissue stem cells  
54 (Nowak, et al., 2008). Thus, cell cycle slowdown within primordial progenitors must be  
55 critical for the specification of tissue stem cell population during development. However,  
56 the molecular mechanism inducing the cell cycle attenuation in the progenitor population  
57 remains largely unknown.

58 Adult airway epithelium shows a low cellular turnover rate, usually more than 4 months,  
59 in rodents (Rock, et al., 2009; Blenkinsopp, 1967). It possesses a substantial ability to  
60 regenerate damaged cells in response to severe injuries caused by a viral infection or  
61 chemical toxicity (Hogan, et al., 2014; Kotton and Morrissey, 2014; Rock, et al., 2011).  
62 Airways display pseudostratified epithelium, which comprises four major cell types,  
63 including ciliated, club, neuroendocrine (NE), and basal cells (Herriges and Morrissey,  
64 2014; Morrissey and Hogan, 2010). Airway basal cells are well-characterized epithelial

65 tissue stem cells (Pardo-Saganta, et al., 2015; Rock, et al., 2009; Hong, et al., 2004) whose  
66 capacity for self-renewal is strictly regulated so that they remain as slow-cycling basal  
67 cells for more than 16 weeks (Rock, et al., 2009). The dysregulation of airway basal cells  
68 can result in fatal diseases, including squamous cell carcinoma (Lapouge, et al., 2011).  
69 Sulfur dioxide (SO<sub>2</sub>) inhalation-induced tissue injury is known as an experimental model  
70 for airway epithelial injury-regeneration; in this model, slow-cycling basal cells can be  
71 activated to proliferate and produce transit-amplifying cells within 48 hours. After these  
72 proliferating transit-amplifying cells repair the epithelial damage, they subsequently start  
73 differentiating into luminal cells to stop the cell cycle progression and hyperplasia (Pardo-  
74 Saganta, et al., 2015; Rock, et al., 2011).

75 During airway development, the basal cells are selected and segregated from primordial  
76 airway progenitors, which show high proliferation profile and arise from the ventral  
77 foregut (Herriges and Morrisey, 2014; Morrisey and Hogan, 2010). During lung  
78 development, primordial airway progenitors commit to the cell lineage, slowing down the  
79 cell cycle and acquiring mature cells' canonical markers (Herriges and Morrisey, 2014).  
80 We had previously reported the crucial function of Notch signaling in alternative cell fate  
81 selection in club, ciliated, and NE cells (Kiyokawa and Morimoto, 2020; Arner, et al.,  
82 2015; Consortium, et al., 2014; Morimoto, et al., 2012; Morimoto, et al., 2010). However,

83 the specific mechanism of slow-cycling basal progenitors during development remains  
84 unclear.

85 In the present study, to unveil the molecular mechanism that establishes slow-cycling  
86 basal cells, we delineated a comprehensive developmental roadmap of mouse airway  
87 epithelial cells using time series, single-cell transcriptome analyses. This approach and *in*  
88 *vivo* lineage tracing experiments defined the trajectory of basal cell differentiation and  
89 identified novel *Krt17*<sup>+</sup> basal progenitors. We also found that genes encoding inhibitors  
90 of DNA-binding/differentiation (Id) proteins promote epithelial proliferation. Tgfβ  
91 signaling reduces *Id2* expression to slow down the progenitors' cell cycle around E14.5,  
92 inducing the *Krt17*<sup>+</sup> basal progenitors and *Scgb3a2*<sup>+</sup> luminal progenitors.

93 In addition, we demonstrated that the *Id2* dosage regulates the proliferation of mature  
94 basal cells. At the perinatal and adult stages, *Id2* expression is further restricted and  
95 maintained at low levels only in mature basal cells to ensure their proliferation potential.  
96 The SO<sub>2</sub>-exposure mediated injury-regeneration model using adult mice showed that an  
97 increased *Id2* expression by Tgfβ suppression initiated the regeneration of the injured  
98 epithelia via promoting basal cells' re-entry into the cell cycle. Furthermore, the artificial  
99 enhancement of *Id2* expression boosted basal cell proliferation and resulted in basal cell  
100 hyperplasia, which resembles a precancerous state. These results imply that the fine-

101 tuning of *Id2* expression is critical for normal tissue regeneration while avoiding  
102 tumorigenesis.

103 In summary, we demonstrate that the Tgfb-Id2 axis is a shared, critical regulator of the  
104 transition between the active proliferation and slow-cycling mode in airway stem cells  
105 during development and adult tissue regeneration.

106

## 107 **Results**

### 108 **Time series single-cell RNA sequencing (scRNA-seq) analyses to delineate a** 109 **developmental roadmap of airway epithelial cells, including basal cells**

110 We aimed to identify a high-fidelity marker of early basal progenitors to elucidate the  
111 developmental process of mature basal cells; p63 is a well-known marker for basal cells  
112 but is not restricted to basal progenitors at early development (Yang, et al., 2018). We  
113 used a droplet-based scRNA-seq with approximately 3500 epithelial cells at six time  
114 points from E12.5 to E18.5 (Figure 1A). This approach allowed us to delineate a  
115 comprehensive lineage map of airway epithelial cells derived from respiratory endoderm  
116 during embryogenesis. We visualized the distinct populations with cluster analysis using  
117 the t-SNE algorithm. Uniform progenitors at E12.5 and E13.5 changed transcriptome

118 profiles at E14.5 and acquired cell type-specific gene signatures by E16.5 (Figures 1B  
119 and S1B, also see Figure 3I). During E12.5 to E14.5, proliferative markers are frequently  
120 detected and are the major determinants for cell clustering analysis (Figure 1B and see  
121 Figure 3A). Epithelial progenitors eventually differentiated into three major populations,  
122 basal, club, and ciliated cells, and one minor population, NE cells (Figure 1B). This  
123 transcriptome clustering and the pseudo-time trajectory analysis using Monocle (Figure  
124 1C) demonstrated that the lineage-specific transcriptional patterns were determined  
125 between E14.5 and E16.5. *Foxj1*<sup>+</sup> ciliated cells first appeared at approximately E14.5,  
126 which was suggested because some of the E14.5 progenitors were classified in the ciliated  
127 cell population (Figure 1B). Other progenitors differentiated into *Krt5*<sup>+</sup> basal cells or  
128 *Scgb1a1*<sup>+</sup> club cells, beginning segregation at E15.5 and becoming more apparent after  
129 E16.5 (Figure 1C). The detection of gene signatures of NE cells, such as *Ascl1* and *Cgrp*,  
130 at E13.5 (Figures 1D and S1A) showed that the differentiation of NE cells occurred the  
131 earliest among the four cell populations; this finding was consistent with a previous study  
132 (Linnoila, 2006).

133 **Binary cell fate decision between *Krt17*<sup>+</sup> basal or *Scgb3a2*<sup>+</sup> luminal intermediate**  
134 **progenitors in primordial progenitors.**

135 We sought a novel marker for basal progenitor more committed to the basal lineage than



136 p63-expressing cells, and Krt17 was selected as a candidate (Supplementary Table 1).  
137 scRNA-seq data and immunostaining revealed that Krt17 mRNA and protein appear at  
138 E13.5 and E14.5, respectively (Figures 1D-F). Krt17-expressing cells become committed  
139 to Krt5<sup>+</sup> basal cells by E18.5 (Figure 1G). We used computational trajectory analyses  
140 (Figures 1H and 1I) and indicated that Krt17<sup>+</sup> progenitors contribute cells to all three  
141 major epithelial cells, including basal cells, but Krt17<sup>-</sup> progenitors do not become basal  
142 cells. Therefore, Krt17 expression is a novel maker for intermediate population in the  
143 basal cell lineage.

144 To validate Krt17 as a novel maker for intermediate population in the basal cell lineage,  
145 we conducted in vivo lineage tracing experiment with *Krt17<sup>CreERT2</sup> Rosa26<sup>mTmG/+</sup>* mice  
146 (Doucet, et al., 2013). A total of 96.8% ± 2.9% (mean ± SD) of *Krt17<sup>+</sup>* progenitors at  
147 E14.5 became mature basal cells at E18.5 (Figures 1J-L), indicating that almost all the  
148 *Krt17<sup>+</sup>* cells at E14.5 have already committed toward basal cells. Thus, the expression of  
149 *Krt17* is an important step for commitment to mature basal cells after the expression of  
150 *p63* (Figure 2G).

151 We further identified *Scgb3a2* as a marker gene for Krt17<sup>-</sup> progenitors by reanalyzing  
152 the scRNA-seq data (Figures S2A-C). *Scgb3a2* appears from E14.5 on in a pattern  
153 mutually exclusive with Krt17 (Figures 2B and S2B), which suggests that equivalent

154 airway progenitors make binary cell fate decision around E14.5 to acquire either  $Krt17^+$   
155 or  $Scgb3a2^+$  ( $Krt17^-$ ) status that do or do not differentiate into basal cells, respectively.  
156 Next, we searched for a cellular signaling pathway that played a critical role in the binary  
157 cell fate decision between  $Krt17^+$  and  $Scgb3a2^+$  progenitors and focused on Notch  
158 signaling because *Scgb3a2* occurs downstream of it (Guha, et al., 2012). To confirm the  
159 role of Notch signaling in the cell fate decision, we genetically ablated *Rbpj*, a cofactor  
160 of Notch signaling, in endodermal epithelium by generating *Shh<sup>Cre</sup>, Rbpj<sup>flox/flox</sup>* mice  
161 (RBPj cKO). In this mutant, the complete loss of *Scgb3a2* is accompanied by the  
162 expression of *Krt17* at E16.5 in almost all epithelial cells (Figure 2C). Thus, Notch  
163 signaling regulates this binary cell fate decision by inhibiting basal cell specification.

164 We further asked whether Notch activated cells during development do give rise to  
165 luminal cells only, never to basal cells. Given that *Notch2* is a major receptor in airway  
166 progenitors (Morimoto, et al., 2012), we employed *N2IP::Cre, Rosa<sup>Ai3/+</sup>* mice in which  
167 progeny of cells with *Notch2* activation expresses a yellow fluorescent protein  
168 (EYFP) (Liu, et al., 2013). As expected, EYFP-expressing cells contributed equally to  
169 club and ciliated cells but never to basal cells (Figures 2D-F), confirming that Notch-  
170 mediated lateral inhibition segregates primordial airway progenitors into  $Krt17^+$  and  
171  $Scgb3a2^+$  cells.

172 Collectively, our time series scRNA-seq analyses show that the gene signature of NE  
173 cells is first established at approximately E13.5. The remaining progenitors begin to  
174 produce two intermediate progenitors, *Krt17*<sup>+</sup> and *Scgb3a2*<sup>+</sup>, around E14.5 by Notch-  
175 mediated lateral inhibition. Basal cell fate is restricted to *Krt17*<sup>+</sup> cells at E14.5, and a  
176 mature gene signature such as *Krt5* is established at approximately E16.5 (Figure 2G).

177 **Cell cycle slowdown induces basal cell specification concomitant with**  
178 **downregulation of *Id* gene expression**

179 To elucidate the temporal regulation of epithelial progenitors' progression into slow-  
180 cycling state, we analyzed the scRNA-seq dataset with the Seurat package on the basis of  
181 enrichment of cell cycle marker expression. A substantial decrease in numbers of  
182 proliferating cells in S and G2-M phases was observed from E14.5 (Figures 3A and 3B),  
183 consistent with *in vivo* cell cycle analysis using Fucci mice (*Shh-Cre, Rosa*<sup>H2B-EGFP/FucciG1</sup>).  
184 Numbers of cells in G0 phase (quiescent state) significantly increased between E14.5 and  
185 E16.5 (5.9% ± 1.8% vs. 22.5% ± 3.3%, mean ± SD) (Figure S2D). A BrdU incorporation  
186 assay with mouse embryos also showed a substantial decrease in the ratio of proliferative  
187 cells from E14.5 to E16.5 (54.0% ± 2.1% vs. 14.3% ± 3.6%, mean ± SD) (Figures 3C and  
188 3D). Additionally, p63<sup>+</sup> cells showed a faster decrease in BrdU incorporation than p63<sup>-</sup>  
189 cells (Figure S2E). These results suggest that cell cycle slowdown preferentially occurs

190 in p63<sup>+</sup> progenitors before the complete commitment into basal cell lineage and  
191 subsequently induces Krt17 expression. Based on these results, we hypothesize that  
192 epithelial quiescence occurs before basal cell specification.

193 We tested this hypothesis with *ex vivo* culture of E12.5 developing trachea, where  
194 epithelial cells are highly proliferative and do not show any lineage commitment, with  
195 and without PD0332991 (Cdk4/6 inhibitor, hereafter Cdk4/6i). Cdk4/6i inhibitor  
196 treatment induces cell cycle arrest at the G1 phase and the differentiation into Krt17<sup>+</sup> cells  
197 in a dose-dependent manner (Figures 3E and 3F). Furthermore, Scgb3a2 cells were  
198 significantly increased following Cdk4/6i treatment (Figures 3G and 3H). Hence, cell  
199 cycle arrest in epithelial progenitors is sufficient to induce basal cell specification and  
200 promote differentiation of Krt17<sup>+</sup> basal progenitors.

201 To identify transcription factors (TFs) related to the epithelial cell cycle slowdown, we  
202 repeated cluster analysis using all 1385 genes, which are classified as TFs in Fantom5  
203 SSTAR database (Figures 3I and 3J) (Abugessaisa, et al., 2016). The cells showed similar  
204 TF profiles at E12.5 and E13.5 but dynamically changed their TF profiles between E14.5  
205 and E16.5, establishing distinct lineage-specific profiles. We focused on genes with  
206 expression levels that substantially changed at E14.5 and noted inhibitors of DNA-  
207 binding/differentiation genes (*Id1*, *Id2*, and *Id3*) (Figure S2F). Generally, Id proteins

208 promote proliferation by antagonizing negative cell cycle regulators, such as Rb, and  
209 simultaneously inhibit differentiation by binding with various bHLH-type TFs(Roschger  
210 and Cabrele, 2017; Lasorella, et al., 2014). *Id4* was not detected in our dataset, yet the  
211 expression of *Id1*, *Id2*, and *Id3* was abundant in progenitors until E14.5 and then  
212 decreased along with the slowing of the cell cycle (Figure 3K). This temporal reduction  
213 in expression of *Id* genes was confirmed with proximity ligation *in situ* hybridization  
214 (PLISH)(Nagendran, et al., 2018) and dot quantification (Figures 3L and 3M). Ki67<sup>+</sup>  
215 proliferative cells preferentially express *Id2* gene (Figure 3N) and *Id* genes expression  
216 was lower in Krt17<sup>+</sup> cells than Krt17<sup>-</sup> cells at E14.5 (Figure S2G). These observations are  
217 consistent with the hypothesis that the reduction in *Id* expression is involved in cell cycle  
218 slowdown in tracheal epithelium, which triggers the basal cell specification.

219 ***Id2* downregulation promotes basal cell specification of epithelial progenitors**  
220 **through cell cycle modulation**

221 Next, to confirm the roles of *Id* genes in modulating epithelial cell cycle and basal cell  
222 specification, we used *Id2* loss- and gain-of-function transgenic mice. *Id2*<sup>CreERT2/CreERT2</sup>  
223 mice were used as *Id2* knockout mice (*Id2* KO mice)(Rawlins, et al., 2009) (Figures S3C  
224 and S3D). BrdU incorporation assays with *Id2* KO mice showed a significant decrease in  
225 proliferating cells at E14.5 and E15.5 (Figures 4A and S3A). Additionally, both Krt17<sup>+</sup>

226 and *Scgb3a2*<sup>+</sup> progenitors were detected earlier in *Id2* KO mice than in control mice  
227 (Figure 4B). Thus, the loss of *Id2* appears to accelerate airway progenitor specification  
228 by lowering the proliferation rate. *Shh*<sup>Cre</sup>, *Rosa*<sup>3xHA-Id2-IRES-H2B-EGFP</sup> mice (*Id2* OE) that  
229 overexpress *Id2* in endodermal epithelial cells (Figures S3E and S3F) significantly  
230 increased *Ki67*<sup>+</sup> proliferative cells at E14.5 and E16.5 (Figures 4C and S3B) and  
231 decreased both *Krt17*<sup>+</sup> and *Scgb3a2*<sup>+</sup> progenitors at E14.5 (Figures 4C and 4D). Based  
232 on these observations, we conclude that the temporal regulation of *Id2* dosage determines  
233 the timing of the epithelial cell cycle and basal cell specification.

234 **Mesenchymal-to-epithelial Tgfβ signaling initiates cell cycle slowdown in epithelial**  
235 **cells by suppressing the *Id2* gene**

236 Since *Id* genes are known to be downstream factors of Tgfβ signaling in hematopoietic  
237 cells (Roschger and Cabrele, 2017; Lasorella, et al., 2014), we evaluated the effects of  
238 Tgfβ signaling on *Id* genes using *Shh*<sup>Cre</sup>, *Tgfbr2*<sup>flox/flox</sup> mice in which the *Tgfβ receptor 2*  
239 gene is ablated in the endodermal epithelium (*Tgfbr2* cKO). The *Id2* gene expression was  
240 significantly upregulated in the *Tgfbr2* cKO mice at E14.5 (Figure 4E), suggesting that  
241 Tgfβ inhibits *Id2* expression. Consistent with the enhanced *Id2* phenotype, epithelial cells  
242 in *Tgfbr2* cKO mice showed more *Ki67*<sup>+</sup> proliferative cells and a more delayed  
243 appearance of *Krt17*<sup>+</sup> progenitors than those in the control mice (Figure 4F). At E18.5,

244 *Tgfb2* cKO mice showed a significant decrease in mature *Krt5*<sup>+</sup> basal cells (Figure 4G),  
245 indicating that *Tgfb2* activation is involved in basal cell specification by inhibiting *Id2*  
246 expression. These findings are consistent with the previous report that Smad activation  
247 through Tgf $\beta$  signaling is necessary for the specification of human *p63*<sup>+</sup> basal cell  
248 population from *Id2*<sup>+</sup> primordial progenitors (Miller, et al., 2020). *Ex vivo* trachea culture  
249 with Tgf $\beta$  ligands (Tgf $\beta$ -1/2/3) confirms that Tgf $\beta$  ligand inhibits *Id2* expression, forces  
250 epithelial cells into slow cycling, and induces more *Krt17*<sup>+</sup> cells than Tgf $\beta$  inhibitor  
251 (SB431542) (Figures 4H-J). Hence, we propose that Tgf $\beta$  signaling acts as the initial cue  
252 for the epithelial cell cycle slowdown and the specification of the *Krt17*<sup>+</sup> basal  
253 progenitors by decreasing *Id2* gene expression.

254 Next, we investigated Tgf $\beta$  ligand-secreting cells with PLISH and found that  
255 mesenchymal cells express *Tgf $\beta$ -3* throughout development (Figure S4A). The number  
256 of Tgf $\beta$ -3-secreting cells decrease over time, but subepithelial mesenchymal cells are  
257 positive for *Tgf $\beta$ -3* even at E18.5. Thus, it is highly likely that airway mesenchyme is the  
258 major source of the Tgf $\beta$  ligand.

259 ***Id2* expression in mature basal stem cells ensures their proliferative potential at**  
260 **perinatal and adult stages**

261 While we showed that *Id2* attenuation is the key step for the specification of basal cell  
262 progenitors in development, the predominant expression of *Id* genes in mature basal cells  
263 has been reported in adulthood (Montoro et al., 2019). We compared *Id2* expression  
264 between basal and luminal cells isolated from Krt17-EGFP transgenic mice (Bianchi, et  
265 al., 2005) at E18.5 using qRT-PCR and confirmed twofold higher expression of *Id2* in  
266 basal cells in compare to luminal cells (Figure 5A). Therefore, next, we asked whether  
267 the *Id2* gene's function in regulating proliferation during development was conserved at  
268 perinatal and adult stages. We employed a tracheosphere culture assay and estimated the  
269 colony-forming efficiency (CFE) in *Id2* KO, control, and *Id2* OE mice at E18.5 (Figure  
270 5B). The epithelial cells from the *Id2* OE mice showed a significantly higher CFE than  
271 those in other groups, suggesting that the *Id2* dosage was related to the proliferative  
272 capacity of epithelial cells at the perinatal stage. The predominant expression of *Id2* in  
273 basal cells was also detected in 2-month-old adult mice (Figure 5A). Similar to E18.5,  
274 basal cells from *Id2* OE mice showed a significantly higher CFE than those in the control  
275 group (Figure 5C). These results confirm that the *Id2* dosage ensures the self-renewal  
276 capacity of basal cells at perinatal and adult stages.

277 **The slow-cycling basal cells re-enter the cell cycle with recurrent *Id2* activation**  
278 **following injury**



279 Next, we asked whether *Id2* was involved in airway tissue regeneration at the adult stage.  
280 SO<sub>2</sub>-inhalation mediated airway injury can be used as a model to study basal cell-driven  
281 airway epithelial regeneration (Pardo-Saganta, et al., 2015; Rawlins, et al., 2007;  
282 Borthwick, et al., 2001). Therefore, we used this model to assess the airway epithelial  
283 regeneration process. The number of Ki67-expressing cells started increasing at 18 h  
284 post-injury (hpi), and peaked at approximately 24 hpi (Figure 6A), suggesting that the  
285 transition of basal cells from slow-cycling to active proliferation occurs around 18 hpi.  
286 An increase in *Id2* expression was detected at 12 hpi before the increase in Ki67-  
287 expressing cells (Figure 6B). These observations prompted us to hypothesize that  
288 recurrent *Id2* activation stimulated basal cells to re-enter the active cell cycle. We exposed  
289 wild-type and *Id2* OE adult mice to SO<sub>2</sub> gas and examined their respective number of  
290 Ki67-expressing cells to test this hypothesis. Airways from the *Id2* OE mice showed a  
291 more rapid response to injury than airways from wild-type mice at 12 hpi (Figure 6C),  
292 indicating the artificially increased *Id2* expression enhances basal cell proliferation.  
293 Additionally, *Id2* OE prolonged the proliferation of Krt5<sup>+</sup> basal cells more than 72 hpi  
294 and prohibited basal cell differentiation into Krt5<sup>-</sup> luminal cells, showing the phenotype  
295 similar to basal cell hyperplasia, a precancer-like state (Figure 6C). These results imply  
296 that high *Id2* expression in airway epithelial cells promoted the transition of basal cells

297 from the slow-cycling to the active proliferation state; in contrast, sustained *Id2*  
298 expression inhibits a return from the active proliferation state to the slow-cycling state.  
299 Thus, *Id2* is a key factor in regulating basal cells' transition from slow cycling to  
300 proliferation in response to epithelial damage and inhibiting their differentiation into  
301 luminal cells.

302 **The inhibitory effect of Tgf $\beta$  signaling on *Id2* expression is conserved until adult**  
303 **stages**

304 Lastly, we attempted to determine that the inhibitory effect of Tgf $\beta$  signaling on *Id2*  
305 expression in lung development is conserved at perinatal and adult stages. First, we  
306 checked the expression pattern of pSmad2/3 at E18.5, which is downstream of Tgf $\beta$   
307 signaling. Consistent with predominant *Id2* expression in mature basal cell population,  
308 pSmad2/3 expression is significantly lower in mature basal cells than luminal cells  
309 (Figure 7A). In addition, Tgf $\beta$  superfamily signaling inhibitors, such as *Tgif1*, *Nb11*,  
310 *Sostdc1*, and *Fst* are highly and exclusively expressed in basal cell population (Figures  
311 S5A-F). These observations suggest that basal cells may express Tgf $\beta$  inhibitors to inhibit  
312 Tgf $\beta$  signaling and maintain *Id2* expression. Supporting this idea, dual Smad inhibition  
313 via Tgf $\beta$ /Bmp inhibitors is beneficial for the maintenance of mature basal cells (Mou, et  
314 al., 2016; Tadokoro, et al., 2016). The inhibitory effect of Tgf $\beta$  signaling on *Id2*

315 expression was directly confirmed by the basal cell culture with Tgf $\beta$  ligands (Tgf $\beta$ -1/2/3)  
316 or inhibitor (SB431542) (Figure 7B). Tgf $\beta$  ligands treatment significantly decreased *Id2*  
317 expression in basal cell culture.

318 We further assess the function of Tgf $\beta$  signaling in *in vivo* tissue regeneration process.  
319 *Tgf $\beta$ -3* and pSmad2/3 expression after SO<sub>2</sub> injury was monitored with PLISH and  
320 immunostaining, respectively. *Tgf $\beta$ -3* expression was significantly decreased after SO<sub>2</sub>  
321 injury (Figures 7C and 7D), consistent with the decreased pSmad2/3 intensity in both  
322 epithelial and mesenchymal cells. Furthermore, *Tgfbr2* cKO mice at 72 hpi also showed  
323 increased *Id2* expression (Figure 7F) as well as basal cell hyperplasia, the phenocopy of  
324 *Id2* OE mice (Figure 7E). Thus, the Tgf $\beta$ -*Id2* axis is likely a critical regulator of the  
325 transition between the active proliferation and the slow-cycling state, which is conserved  
326 during development and adult tissue regeneration, in airway stem cells.

327

## 328 **Discussion**

329 In the present study, we investigated the conserved mechanism regulating the  
330 proliferation mode transitions of airway basal stem cells in development and  
331 regeneration; we also found that Tgf $\beta$ -*Id2* axis is a commonly shared regulator in both

332 these processes. During basal cell specification in airway development, *Id2* attenuation  
333 triggered by mesenchymal-to-epithelial Tgf $\beta$  signaling slows down epithelial progenitors'  
334 cell cycle and induces the *Krt17*<sup>+</sup> basal progenitors. *Id2* expression ensures mature basal  
335 cells' capacity for self-renewal in a dose-dependent manner. In the adult tissue  
336 regeneration model, the recurrent activation of *Id2* via Tgf $\beta$  reduction initiates tissue  
337 regeneration by forcing the slow-cycling basal cell to re-enter the active cell cycle. While  
338 proliferating basal cells get back to the slow-cycling state by 120 hpi in normal tissue  
339 regeneration, enhanced *Id2* expression or impaired Tgf $\beta$  receptor results in basal cell  
340 hyperplasia that resembles a precancerous condition (Figure 7G).

341 Basal cells' tightly regulated proliferative potential is critical for tissue regeneration,  
342 homeostasis, and the avoidance of pathological conditions. Airway basal cells remain  
343 quiescent under homeostasis; in response to injury, they re-enter the cell cycle to replenish  
344 the lost cells by producing transit-amplifying cells. However, excessive proliferation is  
345 related to squamous cell carcinoma (Lapouge, et al., 2011). Recently, there has been  
346 increasing evidence of tumor cells, including lung cancer cells, hijacking the embryonic  
347 pathways, which control stem and progenitor cell behavior during development  
348 (Laughney, et al., 2020; Tata, et al., 2018; Murry and Keller, 2008). Following this  
349 concept, we demonstrated that mature basal stem cells reutilized the Tgf $\beta$ -*Id2* axis in

350 tissue regeneration for the tightly regulated transitions between slow-cycling and  
351 proliferation. During development, the Tgf $\beta$ -Id2 axis also plays critical roles in regulating  
352 the cell cycle state for the specification of slow-cycling basal progenitors.

353 The acquisition of cellular quiescence in stem cell development has been reported in  
354 mammalian neurogenesis (Furutachi, et al., 2015). A subset of embryonic neuroepithelial  
355 cells slows cell cycling between E13.5 and E15.5, isolating a population of primordial  
356 neural stem cells. The expression of the cyclin-dependent kinase inhibitor, p57,  
357 demarcates primordial neural stem cells from non-stem cells and defines reversible  
358 quiescence status and specification numbers of adult neural stem cells. The embryonic  
359 origin of adult stem cells could acquire quiescence by reducing the number of divisions  
360 at an early stage of development to prevent the exhaustion of the stem cell pool. (Cheung  
361 and Rando, 2013).

362 Id2 was first reported as a marker of multipotent cells at the distal tip region of  
363 developing lungs (Rawlins, et al., 2009). This region includes highly self-renewing  
364 progenitors. However, Id2 function in airway stem cell is still to be determined. We show  
365 that *Id2* is highly expressed in primordial progenitors in developing airways until E14.5  
366 (Figures 3J-M). Generally, *Id* genes display two direct effects on proliferation and  
367 differentiation via independently interacting with negative cell cycle regulators, such as

368 Rb, and differentiation-related TFs, such as bHLH-type TFs(Roschger and Cabrele, 2017;  
369 Lasorella, et al., 2014). *Id* gene dosage during airway development could determine the  
370 proliferation state because *Id2* loss-of-function transgenic mice show advanced cell cycle  
371 attenuation and basal cell specification. In contrast, these processes were delayed in *Id2*  
372 gain-of-function transgenic mice (Figures 4A and 4C). We cannot exclude the possibility  
373 that *Id2* directly inhibits key TFs for epithelial differentiation, although we did not detect  
374 any bHLH-type TFs as promising candidates in our scRNA-seq data. In future studies, a  
375 comprehensive screening assay is required to confirm the existence of specific TFs  
376 responsible for epithelial differentiation.

377 TGF superfamily signaling is reported to induce stem cell quiescence in various  
378 organs(Genander, et al., 2014; Kandasamy, et al., 2014; Nishimura, et al., 2010; Yamazaki,  
379 et al., 2009). In the present study, we showed that Tgf $\beta$  signaling initiates the transition  
380 in airway epithelial cells from the active proliferation to the slow-cycling state by  
381 suppressing *Id2* expression; this transition is most likely conserved during both  
382 development and regeneration. Generally, Tgf $\beta$  activates or suppresses *Id* genes context-  
383 dependently(Roschger and Cabrele, 2017; Lasorella, et al., 2014). Tgf $\beta$  inhibits *Id* genes  
384 in basal keratinocytes that are similar to airway basal cells(Rotzer, et al., 2006). This  
385 inhibitory effect of Tgf $\beta$  is also consistent with dual inhibition of Tgf $\beta$ /BMP signaling

386 that promotes self-renewal of the basal cell population(Mou, et al., 2016; Tadokoro, et al.,  
387 2016). However, the precise molecular mechanism how Tgf $\beta$  signaling inhibits *Id2*  
388 expression is still to be elucidated.

389 The present study shows that mature basal cells maintain moderate *Id2* expression to  
390 ensure proliferative potential at perinatal and adult stages (Figure 5A). Our organoid  
391 culture experiments confirmed the positive function of *Id2* in epithelial proliferation  
392 (Figures 5B and 5C), indicating that *Id2* has a consistent function in basal cell lineage to  
393 promote proliferation in a dose-dependent manner (Figure 7G). This critical role of *Id*  
394 genes is conserved in neural and hematopoietic stem cells(Jung, et al., 2010; Jankovic, et  
395 al., 2007). Additionally, *Id2* dosage directly affects the normal repair processes in  
396 response to SO<sub>2</sub> injury (Figure 6C). After SO<sub>2</sub> injury, the artificial enhancement of the  
397 *Id2* gene accelerates tissue regeneration, but aberrant *Id2* gene expression results in  
398 premalignant basal cell hyperplasia seen in *Id2* OE mice. Thus, the tight regulation of *Id2*  
399 is needed for normal tissue regeneration prohibiting pathological conditions due to  
400 sustained proliferation. Consistent with this conclusion, aberrant *Id* genes expression is  
401 observed in cancer cells in various organs, especially in cancer stem cells including the  
402 lungs, contributing to the tumorigenesis and metastasis (Roschger and Cabrele, 2017;  
403 Lasorella, et al., 2014; Pillai, et al., 2011).

404 In addition, the fact that *Tgfr2* cKO mice phenocopied Id2 OE mice after SO<sub>2</sub> injury  
405 demonstrated that Tgf $\beta$  signaling governs tissue regeneration via controlling proliferative  
406 states of basal stem cells through tight regulation of Id2 expression (Figures 7E and 7F).  
407 Thus, fine tuning of Tgf $\beta$ -Id2 axis is a key for proper recovery from severe tissue damage  
408 caused by influenza virus or SARS-CoV-2 and represents a possible therapeutic target in  
409 squamous lung carcinoma.

410

#### 411 **Acknowledgments**

412 We thank David M. Owens for the *Krt17-CreER* mice, Tasuku Honjo for the *Rbpj* flox  
413 mice, Raphael Kopan for the *N2IP::Cre* mice and the Animal Resource Development Unit.  
414 We also thank Kuraku Shigehiro, Kadota Mitsuru, Nishimura Osamu, Quan Wu, and  
415 Miura Hisashi for assistance with the scRNA-seq data analysis. We thank Raphael Kopan  
416 and Hiroshi Hamada for reviewing the manuscript.

417 These studies are supported by funding from Grants-in-Aid for Scientific Research (B)  
418 (20H03693) (M.M.), Young Scientists (19K17691) (K.H.) of the Ministry of Education,  
419 and Culture, Sports, Science and Technology, Japan; from RIKEN BDR-Otsuka  
420 Pharmaceutical Collaboration Center (RBOC) and from the Special Postdoctoral



421 Researcher (SPDR) Program of RIKEN (H.K.).

422

423 **Author contributions**

424 K.H. and M.M. designed the project and performed experiments with the aid of Y.A. and

425 M.C. K.H. analyzed the single-cell transcriptomics data from embryonic and adult

426 tracheal epithelium. Y.A. assisted with the mouse experiments. M.C. supported the

427 generation of LSL-Id2-IRES-H2B-EGFP. A.T. and K.H. generated the Rosa26<sup>LSL-Id2-IRES-</sup>

428 <sup>H2B-EGFP</sup> animals. K.H. and M.M. wrote the manuscript with the contribution of all authors.

429

430 **Abugessaisa, I., Shimoji, H., Sahin, S., Kondo, A., Harshbarger, J., Lizio, M., Hayashizaki, Y., Carninci, P.,**  
431 **consortium, F., Forrest, A., et al. (2016). FANTOM5 transcriptome catalog of cellular states based on Semantic**  
432 **MediaWiki. Database (Oxford) 2016.**

433 **Arner, E., Daub, C.O., Vitting-Seerup, K., Andersson, R., Lilje, B., Drablos, F., Lennartsson, A., Ronnerblad, M.,**  
434 **Hrydziszczko, O., Vitezic, M., et al. (2015). Transcribed enhancers lead waves of coordinated transcription in**  
435 **transitioning mammalian cells. Science 347, 1010-4.**

436 **Barker, N., Ridgway, R.A., van Es, J.H., van de Wetering, M., Begthel, H., van den Born, M., Danenberg, E.,**  
437 **Clarke, A.R., Sansom, O.J., and Clevers, H. (2009). Crypt stem cells as the cells-of-origin of intestinal cancer.**  
438 **Nature 457, 608-11.**

439 **Bianchi, N., Depianto, D., McGowan, K., Gu, C., and Coulombe, P.A. (2005). Exploiting the keratin 17 gene**  
440 **promoter to visualize live cells in epithelial appendages of mice. Mol Cell Biol 25, 7249-59.**

441 **Blenkinsopp, W.K. (1967). Proliferation of respiratory tract epithelium in the rat. Exp Cell Res 46, 144-54.**

442 **Borthwick, D.W., Shahbazian, M., Krantz, Q.T., Dorin, J.R., and Randell, S.H. (2001). Evidence for stem-cell**  
443 **niches in the tracheal epithelium. Am J Respir Cell Mol Biol 24, 662-70.**

444 **Cheung, T.H., and Rando, T.A. (2013). Molecular regulation of stem cell quiescence. Nat Rev Mol Cell Biol 14,**  
445 **329-40.**

- 446 Consortium, F., the, R.P., Clst, Forrest, A.R., Kawaji, H., Rehli, M., Baillie, J.K., de Hoon, M.J., Haberle, V.,  
447 Lassmann, T., et al. (2014). A promoter-level mammalian expression atlas. *Nature* 507, 462-70.
- 448 Desai, T.J., Brownfield, D.G., and Krasnow, M.A. (2014). Alveolar progenitor and stem cells in lung  
449 development, renewal and cancer. *Nature* 507, 190-4.
- 450 Doucet, Y.S., Woo, S.H., Ruiz, M.E., and Owens, D.M. (2013). The touch dome defines an epidermal niche  
451 specialized for mechanosensory signaling. *Cell Rep* 3, 1759-65.
- 452 Feitelson, M.A., Arzumanyan, A., Kulathinal, R.J., Blain, S.W., Holcombe, R.F., Mahajna, J., Marino, M.,  
453 Martinez-Chantar, M.L., Nawroth, R., Sanchez-Garcia, I., et al. (2015). Sustained proliferation in cancer:  
454 Mechanisms and novel therapeutic targets. *Semin Cancer Biol* 35 Suppl, S25-S54.
- 455 Furutachi, S., Miya, H., Watanabe, T., Kawai, H., Yamasaki, N., Harada, Y., Imayoshi, I., Nelson, M., Nakayama,  
456 K.I., Hirabayashi, Y., et al. (2015). Slowly dividing neural progenitors are an embryonic origin of adult neural  
457 stem cells. *Nat Neurosci* 18, 657-65.
- 458 Gancz, D., Lengil, T., and Gilboa, L. (2011). Coordinated regulation of niche and stem cell precursors by  
459 hormonal signaling. *PLoS Biol* 9, e1001202.
- 460 Genander, M., Cook, P.J., Ramskold, D., Keyes, B.E., Mertz, A.F., Sandberg, R., and Fuchs, E. (2014). BMP  
461 signaling and its pSMAD1/5 target genes differentially regulate hair follicle stem cell lineages. *Cell Stem Cell*  
462 15, 619-33.
- 463 Guha, A., Vasconcelos, M., Cai, Y., Yoneda, M., Hinds, A., Qian, J., Li, G., Dickel, L., Johnson, J.E., Kimura, S.,  
464 et al. (2012). Neuroepithelial body microenvironment is a niche for a distinct subset of Clara-like precursors  
465 in the developing airways. *Proc Natl Acad Sci U S A* 109, 12592-7.
- 466 Herriges, M., and Morrisey, E.E. (2014). Lung development: orchestrating the generation and regeneration  
467 of a complex organ. *Development* 141, 502-13.
- 468 Hogan, B.L., Barkauskas, C.E., Chapman, H.A., Epstein, J.A., Jain, R., Hsia, C.C., Niklason, L., Calle, E., Le, A.,  
469 Randell, S.H., et al. (2014). Repair and regeneration of the respiratory system: complexity, plasticity, and  
470 mechanisms of lung stem cell function. *Cell Stem Cell* 15, 123-38.
- 471 Hong, K.U., Reynolds, S.D., Watkins, S., Fuchs, E., and Stripp, B.R. (2004). Basal cells are a multipotent  
472 progenitor capable of renewing the bronchial epithelium. *Am J Pathol* 164, 577-88.
- 473 Jankovic, V., Ciarrocchi, A., Bocconi, P., DeBlasio, T., Benezra, R., and Nimer, S.D. (2007). Id1 restrains myeloid  
474 commitment, maintaining the self-renewal capacity of hematopoietic stem cells. *Proc Natl Acad Sci U S A* 104,  
475 1260-5.
- 476 Jung, S., Park, R.H., Kim, S., Jeon, Y.J., Ham, D.S., Jung, M.Y., Kim, S.S., Lee, Y.D., Park, C.H., and Suh-Kim, H.  
477 (2010). Id proteins facilitate self-renewal and proliferation of neural stem cells. *Stem Cells Dev* 19, 831-41.
- 478 Kandasamy, M., Lehner, B., Kraus, S., Sander, P.R., Marschallinger, J., Rivera, F.J., Trumbach, D., Ueberham, U.,  
479 Reitsamer, H.A., Strauss, O., et al. (2014). TGF-beta signalling in the adult neurogenic niche promotes stem  
480 cell quiescence as well as generation of new neurons. *J Cell Mol Med* 18, 1444-59.
- 481 Kiyokawa, H., and Morimoto, M. (2020). Notch signaling in the mammalian respiratory system, specifically

- 482 **the trachea and lungs, in development, homeostasis, regeneration, and disease. *Dev Growth Differ* 62, 67-**  
483 **79.**
- 484 **Kotton, D.N., and Morrisey, E.E. (2014). Lung regeneration: mechanisms, applications and emerging stem**  
485 **cell populations. *Nat Med* 20, 822-32.**
- 486 **Lapouge, G., Youssef, K.K., Vokaer, B., Achouri, Y., Michaux, C., Sotiropoulou, P.A., and Blanpain, C. (2011).**  
487 **Identifying the cellular origin of squamous skin tumors. *Proc Natl Acad Sci U S A* 108, 7431-6.**
- 488 **Lasorella, A., Benezra, R., and Iavarone, A. (2014). The ID proteins: master regulators of cancer stem cells**  
489 **and tumour aggressiveness. *Nat Rev Cancer* 14, 77-91.**
- 490 **Laughney, A.M., Hu, J., Campbell, N.R., Bakhoun, S.F., Setty, M., Lavalley, V.P., Xie, Y., Masilionis, I., Carr, A.J.,**  
491 **Kottapalli, S., et al. (2020). Regenerative lineages and immune-mediated pruning in lung cancer metastasis.**  
492 ***Nat Med* 26, 259-269.**
- 493 **Leach, J.P., and Morrisey, E.E. (2018). Repairing the lungs one breath at a time: How dedicated or facultative**  
494 **are you? *Genes Dev* 32, 1461-1471.**
- 495 **Linnoila, R.I. (2006). Functional facets of the pulmonary neuroendocrine system. *Lab Invest* 86, 425-44.**
- 496 **Liu, Z., Chen, S., Boyle, S., Zhu, Y., Zhang, A., Piwnica-Worms, D.R., Ilagan, M.X., and Kopan, R. (2013). The**  
497 **extracellular domain of Notch2 increases its cell-surface abundance and ligand responsiveness during kidney**  
498 **development. *Dev Cell* 25, 585-98.**
- 499 **Mikkola, H.K., and Orkin, S.H. (2006). The journey of developing hematopoietic stem cells. *Development* 133,**  
500 **3733-44.**
- 501 **Miller, A.J., Yu, Q., Czerwinski, M., Tsai, Y.H., Conway, R.F., Wu, A., Holloway, E.M., Walker, T., Glass, I.A.,**  
502 **Treutlein, B., et al. (2020). In Vitro and In Vivo Development of the Human Airway at Single-Cell Resolution.**  
503 ***Dev Cell*.**
- 504 **Morimoto, M., Liu, Z., Cheng, H.T., Winters, N., Bader, D., and Kopan, R. (2010). Canonical Notch signaling in**  
505 **the developing lung is required for determination of arterial smooth muscle cells and selection of Clara versus**  
506 **ciliated cell fate. *J Cell Sci* 123, 213-24.**
- 507 **Morimoto, M., Nishinakamura, R., Saga, Y., and Kopan, R. (2012). Different assemblies of Notch receptors**  
508 **coordinate the distribution of the major bronchial Clara, ciliated and neuroendocrine cells. *Development* 139,**  
509 **4365-73.**
- 510 **Morrisey, E.E., and Hogan, B.L. (2010). Preparing for the first breath: genetic and cellular mechanisms in**  
511 **lung development. *Dev Cell* 18, 8-23.**
- 512 **Mou, H., Vinarsky, V., Tata, P.R., Brazauskas, K., Choi, S.H., Crooke, A.K., Zhang, B., Solomon, G.M., Turner,**  
513 **B., Bihler, H., et al. (2016). Dual SMAD Signaling Inhibition Enables Long-Term Expansion of Diverse**  
514 **Epithelial Basal Cells. *Cell Stem Cell* 19, 217-231.**
- 515 **Murry, C.E., and Keller, G. (2008). Differentiation of embryonic stem cells to clinically relevant populations:**  
516 **lessons from embryonic development. *Cell* 132, 661-80.**
- 517 **Nagendran, M., Riordan, D.P., Harbury, P.B., and Desai, T.J. (2018). Automated cell-type classification in intact**

518 **tissues by single-cell molecular profiling. *Elife* 7.**

519 **Nishimura, E.K., Suzuki, M., Igras, V., Du, J., Lonning, S., Miyachi, Y., Roes, J., Beermann, F., and Fisher, D.E.**

520 **(2010). Key roles for transforming growth factor beta in melanocyte stem cell maintenance. *Cell Stem Cell* 6,**

521 **130-40.**

522 **Nowak, J.A., Polak, L., Pasolli, H.A., and Fuchs, E. (2008). Hair follicle stem cells are specified and function**

523 **in early skin morphogenesis. *Cell Stem Cell* 3, 33-43.**

524 **Pardo-Saganta, A., Law, B.M., Tata, P.R., Villoria, J., Saez, B., Mou, H., Zhao, R., and Rajagopal, J. (2015).**

525 **Injury induces direct lineage segregation of functionally distinct airway basal stem/progenitor cell**

526 **subpopulations. *Cell Stem Cell* 16, 184-97.**

527 **Pillai, S., Rizwani, W., Li, X., Rawal, B., Nair, S., Schell, M.J., Bepler, G., Haura, E., Coppola, D., and Chellappan,**

528 **S. (2011). ID1 facilitates the growth and metastasis of non-small cell lung cancer in response to nicotinic**

529 **acetylcholine receptor and epidermal growth factor receptor signaling. *Mol Cell Biol* 31, 3052-67.**

530 **Rawlins, E.L., Clark, C.P., Xue, Y., and Hogan, B.L. (2009). The Id2+ distal tip lung epithelium contains**

531 **individual multipotent embryonic progenitor cells. *Development* 136, 3741-5.**

532 **Rawlins, E.L., Ostrowski, L.E., Randell, S.H., and Hogan, B.L. (2007). Lung development and repair:**

533 **contribution of the ciliated lineage. *Proc Natl Acad Sci U S A* 104, 410-7.**

534 **Rock, J.R., Gao, X., Xue, Y., Randell, S.H., Kong, Y.Y., and Hogan, B.L. (2011). Notch-dependent differentiation**

535 **of adult airway basal stem cells. *Cell Stem Cell* 8, 639-48.**

536 **Rock, J.R., Onaitis, M.W., Rawlins, E.L., Lu, Y., Clark, C.P., Xue, Y., Randell, S.H., and Hogan, B.L. (2009). Basal**

537 **cells as stem cells of the mouse trachea and human airway epithelium. *Proc Natl Acad Sci U S A* 106, 12771-**

538 **5.**

539 **Roschger, C., and Cabrele, C. (2017). The Id-protein family in developmental and cancer-associated pathways.**

540 ***Cell Commun Signal* 15, 7.**

541 **Rotzer, D., Krampert, M., Sulyok, S., Braun, S., Stark, H.J., Boukamp, P., and Werner, S. (2006). Id proteins:**

542 **novel targets of activin action, which regulate epidermal homeostasis. *Oncogene* 25, 2070-81.**

543 **Shyer, A.E., Huycke, T.R., Lee, C., Mahadevan, L., and Tabin, C.J. (2015). Bending gradients: how the intestinal**

544 **stem cell gets its home. *Cell* 161, 569-580.**

545 **Tadokoro, T., Gao, X., Hong, C.C., Hotten, D., and Hogan, B.L. (2016). BMP signaling and cellular dynamics**

546 **during regeneration of airway epithelium from basal progenitors. *Development* 143, 764-73.**

547 **Tata, P.R., Chow, R.D., Saladi, S.V., Tata, A., Konkimalla, A., Bara, A., Montoro, D., Hariri, L.P., Shih, A.R., Mino-**

548 **Kenudson, M., et al. (2018). Developmental History Provides a Roadmap for the Emergence of Tumor**

549 **Plasticity. *Dev Cell* 44, 679-693 e5.**

550 **Yamazaki, S., Iwama, A., Takayanagi, S., Eto, K., Ema, H., and Nakauchi, H. (2009). TGF-beta as a candidate**

551 **bone marrow niche signal to induce hematopoietic stem cell hibernation. *Blood* 113, 1250-6.**

552 **Yang, Y., Riccio, P., Schotsaert, M., Mori, M., Lu, J., Lee, D.K., Garcia-Sastre, A., Xu, J., and Cardoso, W.V.**

553 **(2018). Spatial-Temporal Lineage Restrictions of Embryonic p63(+) Progenitors Establish Distinct Stem Cell**

554 **Pools in Adult Airways. Dev Cell 44, 752-761 e4.**

555 **Yanger, K., and Stanger, B.Z. (2011). Facultative stem cells in liver and pancreas: fact and fancy. Dev Dyn 240,**

556 **521-9.**

557

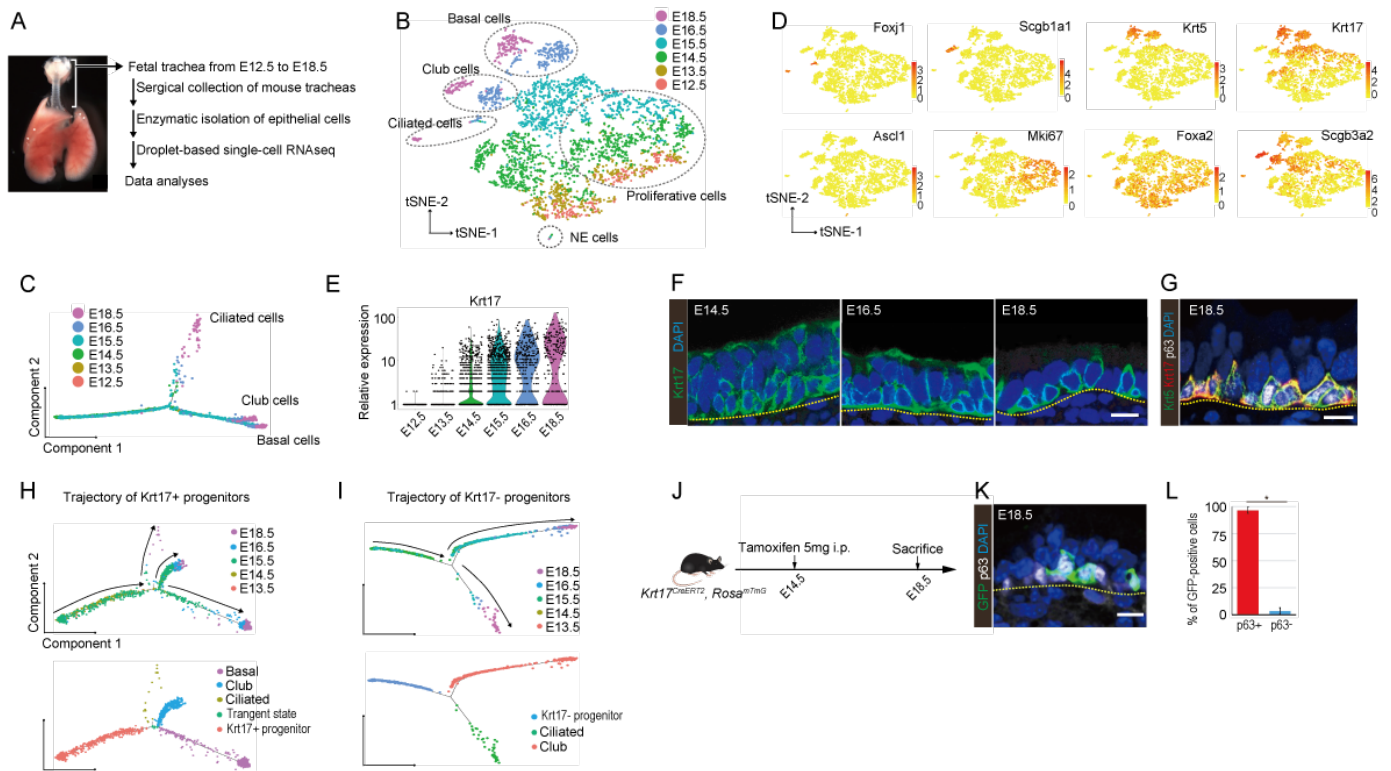

**Figure 1. Time-series scRNA-seq analyses delineate a developmental roadmap of airway epithelial cells, including basal cells.**

(A) Schematic representation of the time-series scRNA-seq analyses of developing tracheal epithelial cells. (B) The t-SNE plot of single cells displayed thirteen distinct clusters, including four distinct mature cell types. (C) Pseudotime analysis with the Monocle package illustrated the developmental trajectories towards three mature cell lineages. (D) Canonical marker expression in the t-SNE map. (E) The temporal expression of *Krt17* in the scRNA-seq data. (F-G) Immunostaining for *Krt17* in the developing trachea confirmed the limited expression pattern in basal cells. *In silico* trajectory analyses of the *Krt17*-expressing (H) and nonexpressing progenitors (I) using Monocle. (J) Lineage tracing experiment for the *Krt17*<sup>+</sup> progenitors at E14.5 using the *Krt17*<sup>CreERT2</sup> *Rosa26*<sup>mTmG/+</sup> mice. (K) Immunostaining for GFP and p63 revealed that most *Krt17*<sup>+</sup> progenitors at E14.5 contributed to p63<sup>+</sup> cells at E18.5 (L) (mean±SD, n=4). \* p< 0.05; Student's t test. Scale bars, 5 μm.

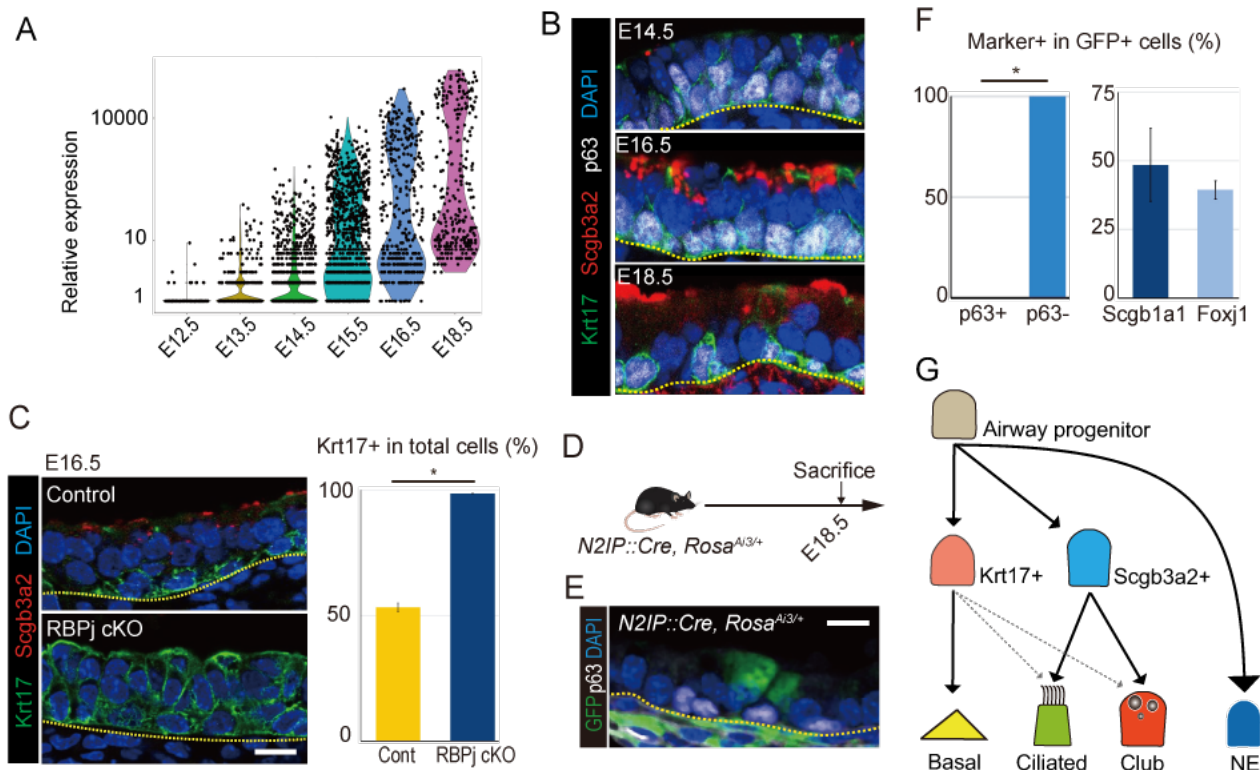

**Figure 2. Binary cell fate decision between *Krt17*<sup>+</sup> basal or *Scgb3a2*<sup>+</sup> luminal intermediate progenitors in primordial progenitors.**

(A) The temporal expression of *Scgb3a2* over time in the scRNA-seq dataset. (B) Actual expression patterns of *Scgb3a2* and *Krt17* detected by immunostaining. (C) Phenotypic analyses of the RBPj KO mice tracheas at E16.5 by immunostaining for *Krt17* and *Scgb3a2* revealed the expansion of *Krt17*<sup>+</sup> progenitors at the expense of *Scgb3a2*<sup>+</sup> progenitors. (D) The lineage tracing experiment for the progenitors that experienced Notch2 activation during development was performed with *N2IP::Cre, Rosa<sup>Ai3/+</sup>* mice. (E,F) Quantitative immunostaining assessment with anti-GFP antibody demonstrated their exclusive contribution to p63<sup>-</sup> luminal cells at E18.5. (G) Schematic summary of the roadmap for developing airway epithelial cells showing two types of progenitors, *Krt17*<sup>+</sup> and *Scgb3a2*<sup>+</sup> (*Krt17*<sup>-</sup>) progenitors.

\*  $p < 0.05$ ; Student's t test. Mean $\pm$ SD, n=4–6 (C, F). Scale bars: 5  $\mu$ m.

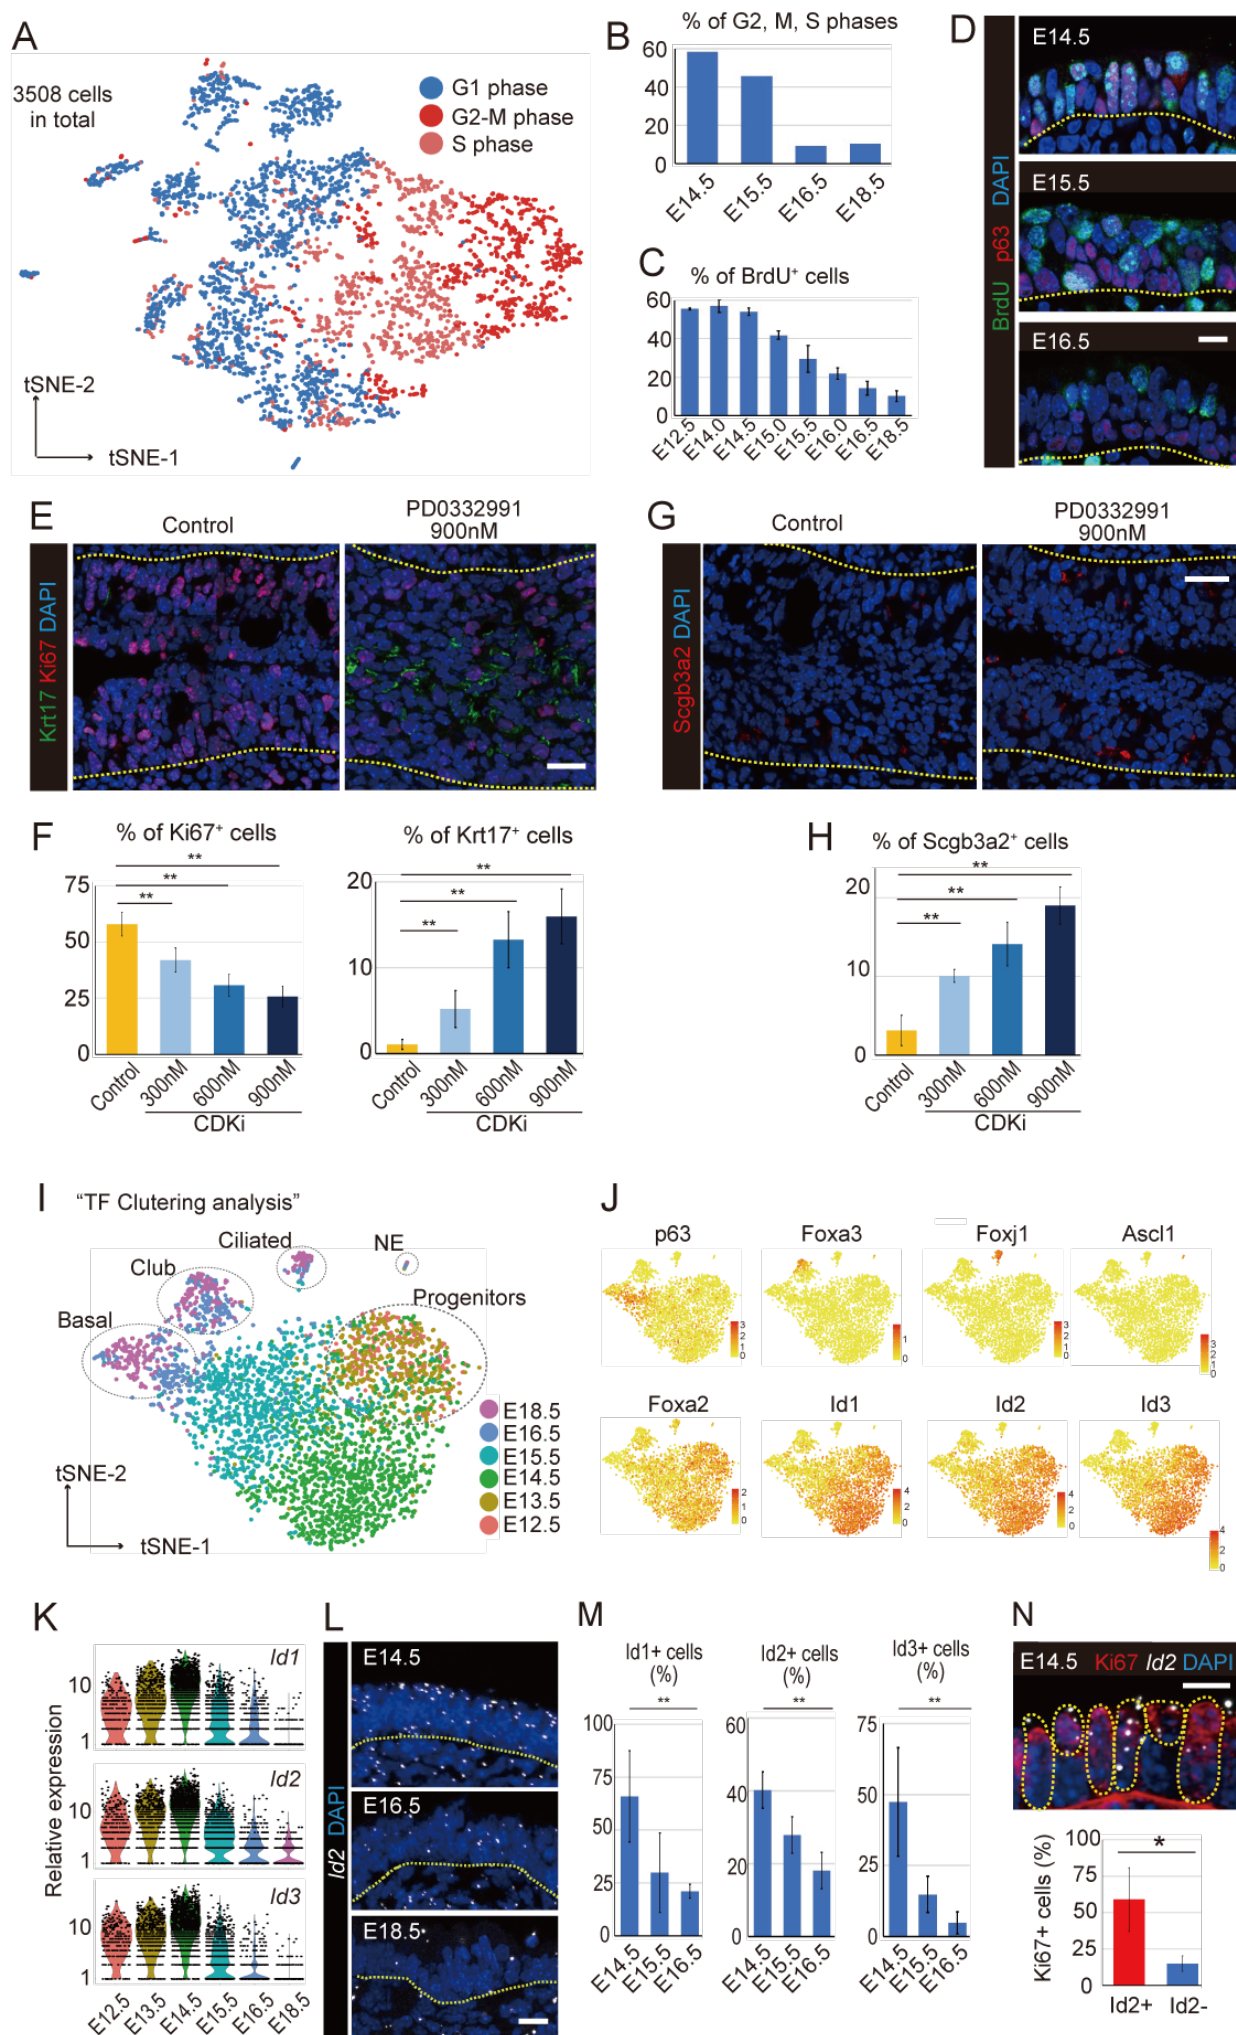



**Figure 3. Cell cycle slowdown induces basal cell specification concomitant with downregulation of *Id* gene expression.**

(A) Cell cycle analysis with the scRNA-seq data using the Seurat package. (B) The ratio of cells expressing markers of S, G2, and M phases revealed a substantial decrease in proliferating cells from E14.5. (C-D) BrdU incorporation assay with immunostaining confirmed the cell cycle deceleration from E14.5. (E-G) Immunostaining for Krt17, Scgb3a2, and Ki67 in *ex vivo* cultured fetal tracheal epithelium. (F-H) Quantification of the marker-positive cells determined that PD0332991 (Cdk4/6 inhibitor) treatment induces differentiation while inhibiting proliferation in a dose-dependent manner. Reclustering analysis with TFs only (I) and expression patterns of the marker TFs (J). *Id* gene expression in the scRNA-seq data (K), PLISH for *Id2* (L), and quantification of *Id1*-, *Id2*-, and *Id3*-positive cells in PLISH (M) suggested that *Id* gene expression peaked at E14.5 and gradually decreased after that. (N) Double staining for Ki67 protein and *Id2* mRNA with immunostaining and PLISH suggested the dominant expression of *Id2* in proliferating cells. \*  $p < 0.05$ ; Student's t test. \*\*  $p < 0.05$ ; Tukey's test. Mean $\pm$ SD, n=4–6 (C, M, N), 3 independent experiments (F, H). Scale bars: 5  $\mu$ m (D, L, N), 10  $\mu$ m (E, G).

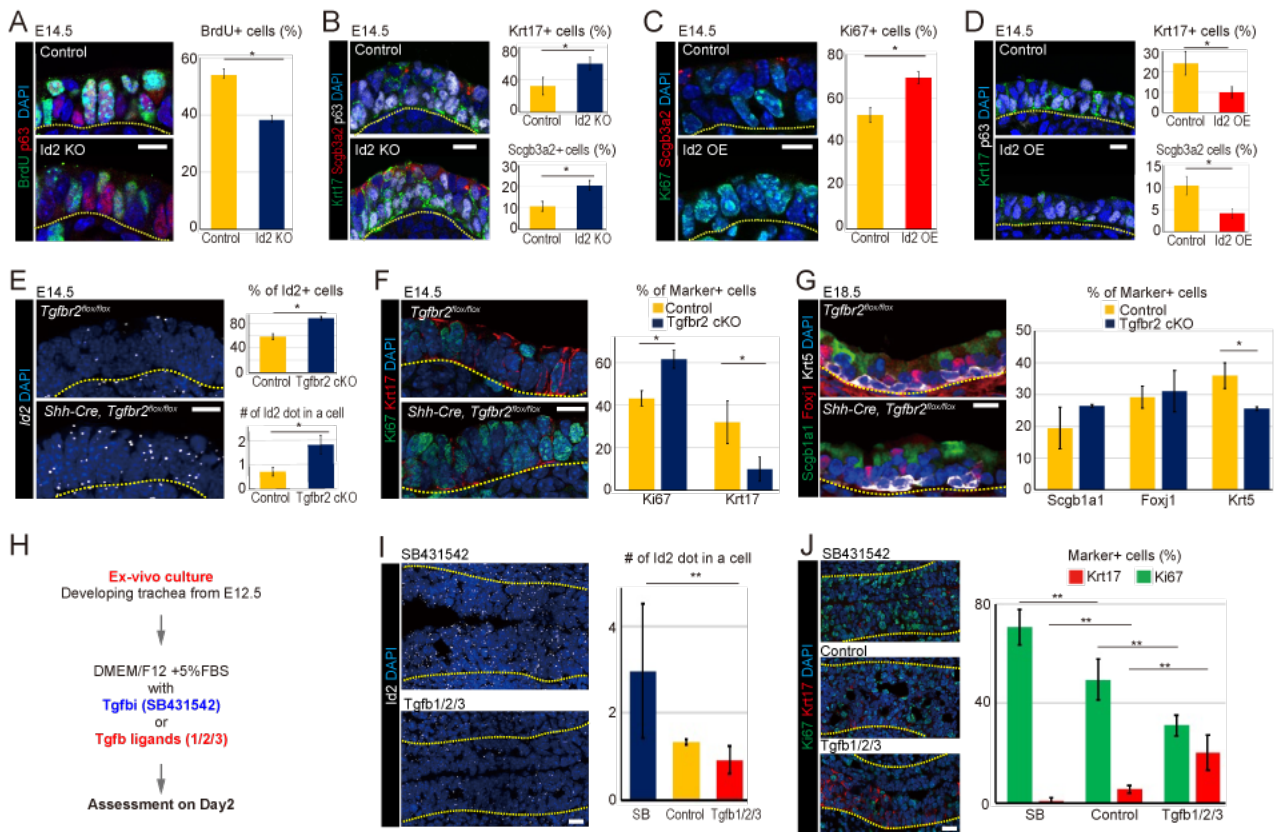

**Figure 4. Tgfb signaling initiates cell cycle slowdown in epithelial cells by suppressing *Id2* gene expression.**

The phenotypic analyses of tracheas from the *Id2* KO and OE groups assessed at E14.5 by immunostaining for BrdU and p63 (A), Scgb3a2 and Krt17 (B), Ki67 and Scgb3a2 (C), and p63 and Krt17(D) revealed that *Id2* promotes proliferation while inhibiting differentiation. (E) Differences in *Id2* expression between tracheas from the control and *Tgfb2* KO groups assessed at E14.5 with PLISH confirmed that Tgfb signaling inhibits *Id2* expression. (F) Immunostaining for Ki67 and Krt17 in *Tgfb2* KO epithelium at E14.5 showed that loss of Tgfb signaling suppresses Krt17 expression, enhancing proliferation. (G) At E18.5, epithelial *Tgfb2* KO resulted in a significant decrease in mature basal cells but not in other cell types. (H) Schematic representation of *ex vivo* fetal trachea culture. Expression of *Id2* mRNA (PLISH) (I) and Ki67/Krt17 protein (immunostaining) (J) in *ex vivo* cultured trachea after 2 days of treatment with Tgfb-1/2/3 ligands or SB431542 confirmed that Tgfb signaling suppresses *Id2* and Ki67 expression, increasing Krt17 expression. \* p < 0.05; Student's t test. \*\* p < 0.05; Tukey's test. Mean±SD, n=4-6 (A-G), 3 independent experiments (I- J). Scale bars: 5 µm.

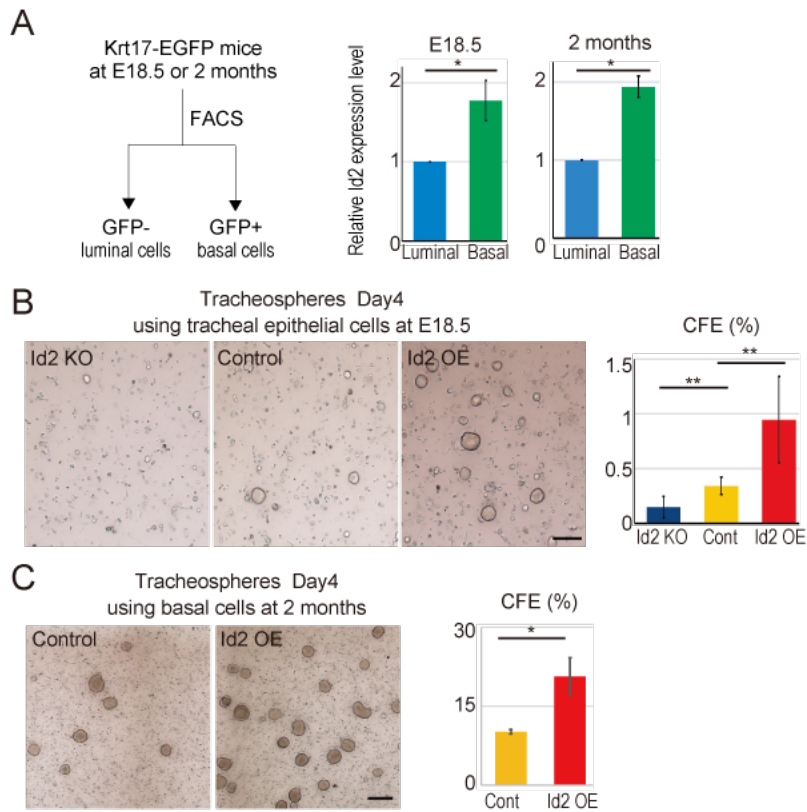

**Figure 5. Predominant *Id2* expression in mature basal cells ensures their proliferative potential at perinatal and adult stages.**

(A) Krt17<sup>+</sup> and Krt17<sup>-</sup> cells were sorted based on GFP intensity from the tracheas of Krt17-EGFP mice at E18.5 or 2 months, and *Id2* expression was assessed with qRT-PCR. *Id2* expression was significantly higher in the Krt17<sup>+</sup> cells than in the Krt17<sup>-</sup> cells at both timepoints. Tracheosphere culture at day 4 using tracheal epithelial cells derived from the *Id2* KO, control, and *Id2* OE mice at E18.5 (B) or 2 months (C) confirmed that the CFE reflects the dosage of *Id2* at both timepoints. \*  $p < 0.05$ ; Student's t test. \*\*  $p < 0.05$ ; Tukey's test. Mean $\pm$ SD, 4 independent experiments (A-C). Scale bars; 300  $\mu$ m.

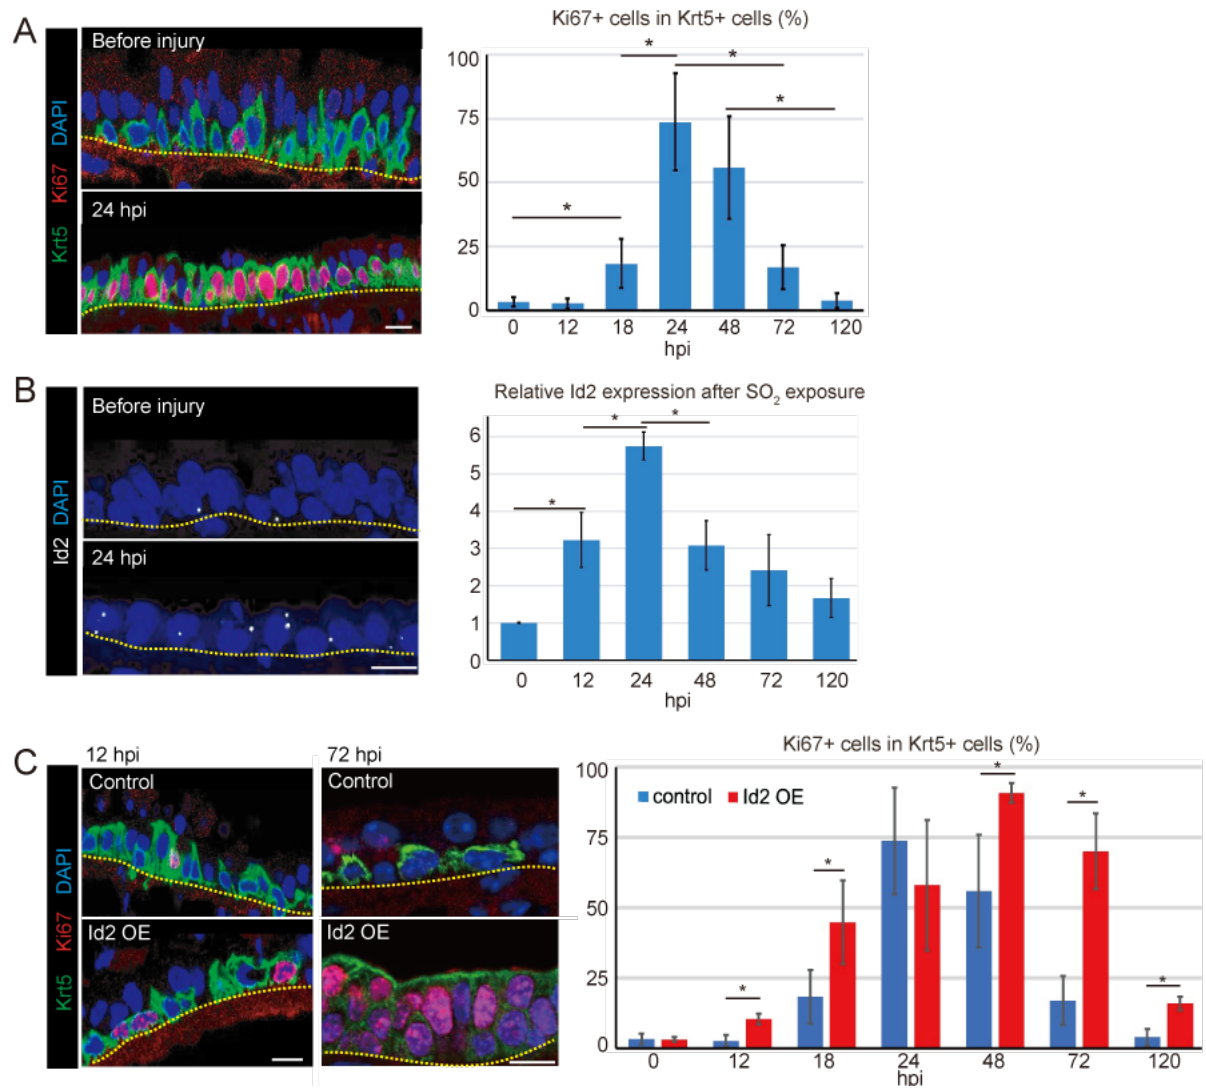

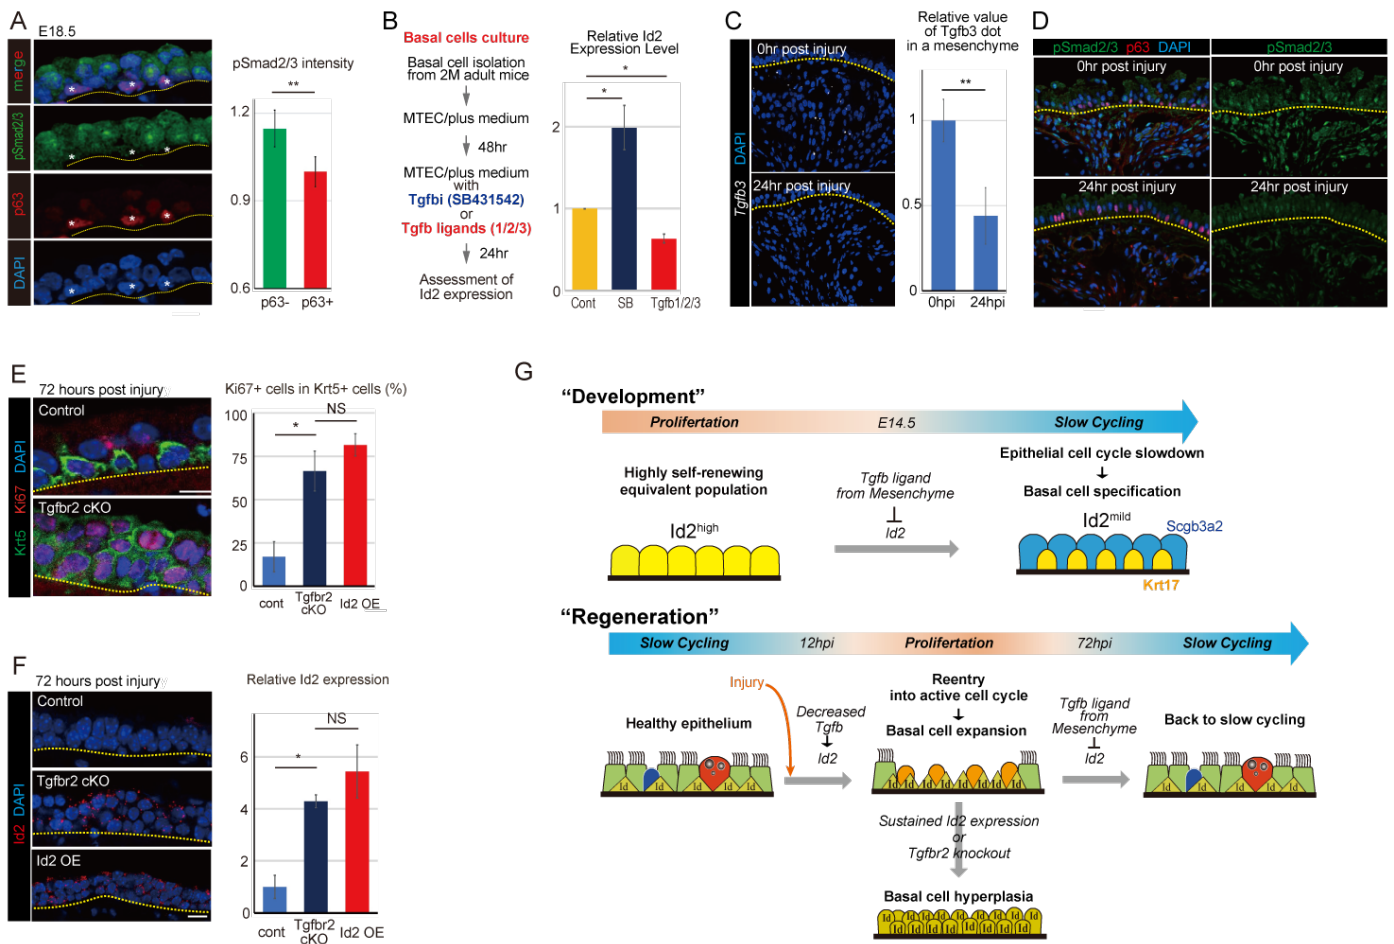

**Figure 7. The inhibitory effect of Tgfβ signaling on *Id2* expression is conserved until adult stage.**

(A) Quantitative assessment of pSmad2/3 staining intensity showed higher expression in the p63<sup>-</sup> luminal cells than in the p63<sup>+</sup> basal cells. Asterisks indicate the p63<sup>+</sup> basal cells. (B) Basal cells were sorted based on EpCAM/NGFR from the tracheas of 2-month-old wild-type mice, and *Id2* expression was assessed with qRT-PCR after 1 day culture with Tgfb ligands(1/2/3 or Tgfb inhibitor(SB431542). Tgfb inhibitor treatment significantly increased *Id2* expression, while Tgfb ligands treatment significantly decreased *Id2* expression. (C) *Tgfb3* detected by PLISH at 0 and 24 hpi confirmed the significant decrease of Tgfb3 expression in mesenchymal cells after SO<sub>2</sub> injury. (D) Immunostaining with anti-pSmad2/3 antibody demonstrated the decreased expression of pSmad2/3 in both epithelial and mesenchymal cells after SO<sub>2</sub> injury. (E) Assessment of proliferating basal cells in injured airway epithelium by immunostaining for Ki67 and Krt5. Tgfr2 cKO mice phenocopied the basal cell hyperplasia phenotype seen in *Id2* OE mice. (F) *Id2* expression at 72hpi was assessed with RNAscope. *Id2* expression was significantly increased in *Tgfr2* cKO and *Id2* OE mice compared to control. (G) Schematic summary of slow-cycling basal cell specification during development. *Id2* attenuation triggered by Mesenchymal-to-epithelial Tgfβ signaling slows down the cell cycle and contributes to the specification of Krt17<sup>+</sup> basal cell progenitors. See discussion for the details. Schematic summary of the function of *Id2* gene during tissue regeneration following SO<sub>2</sub> injury. SO<sub>2</sub> injury decreases Tgfβ3 secretion from mesenchyme, which reactivates *Id2* expression in basal cells. Recurrent *Id2* activation initiates basal cell expansion, but its sustained expression results in basal cell hyperplasia. See discussion for the details. hpi, hours post injury. \* p < 0.05; Tukey’s test. \*\* p < 0.05; Student’s t test. NS; Not significant. Mean±SD, n=4-6 (A-C, E, F). Scale bars: 5 μm.

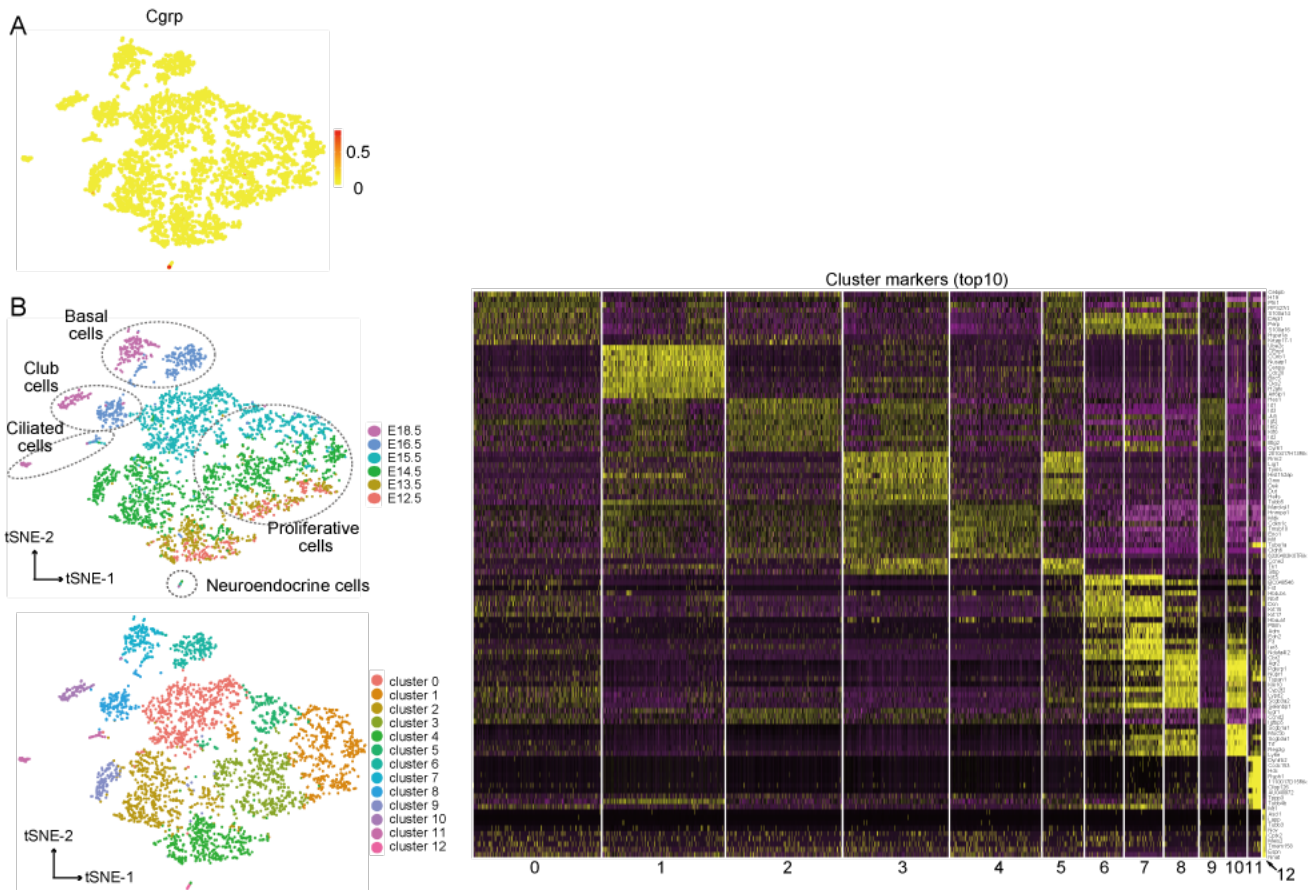

**Figure S1. scRNA-seq analyses using embryonic progenitors**

(A) Cgrp expression in the scRNA-seq dataset. (B) Clustering analysis and cluster markers (top 10) in a heatmap using embryonic progenitors from E12.5 to E18.5.

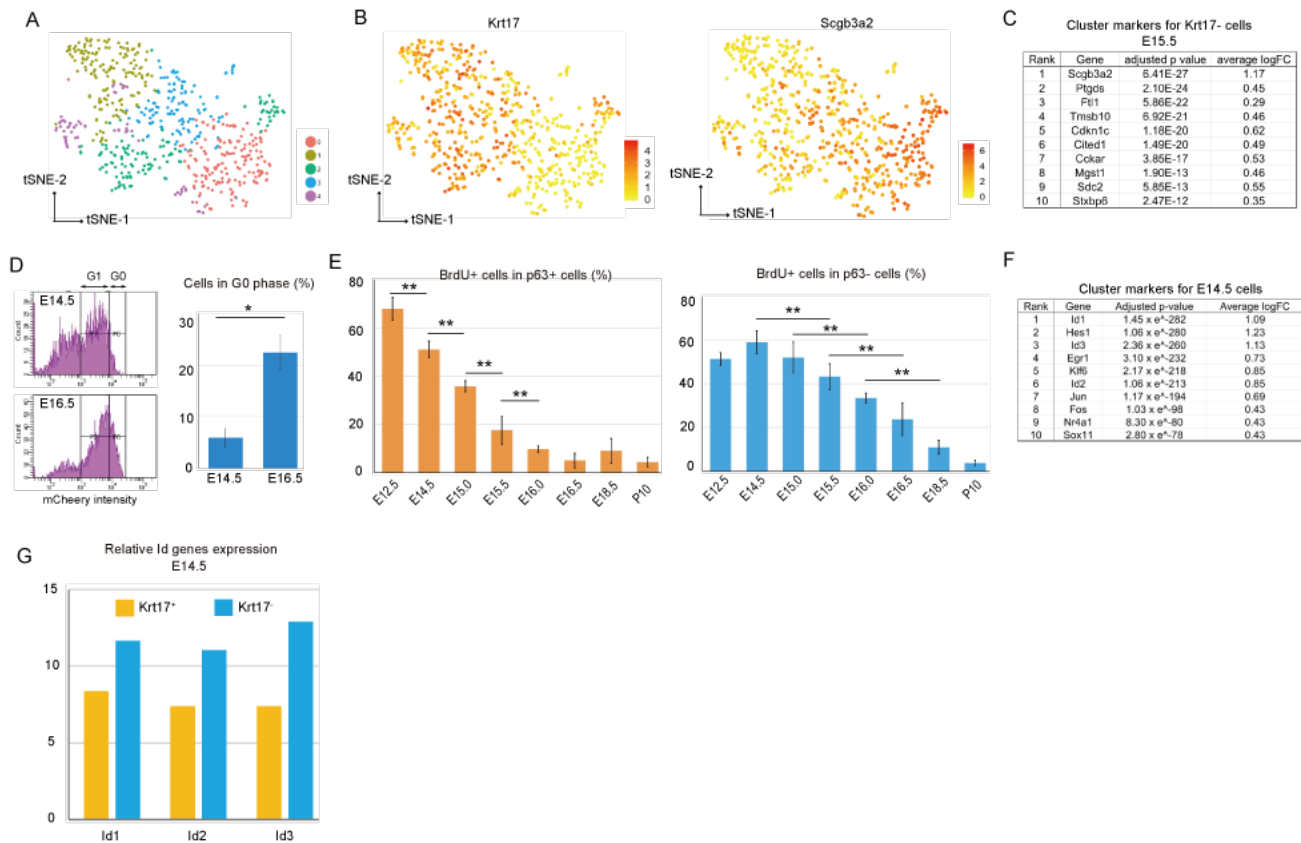

**Figure S2. scRNA-seq analyses using E15.5 epithelial progenitors only and proliferative profile analyses**

(A) Clustering analysis using epithelial cells from the E15.5 trachea only. (B) The mutually exclusive expression patterns of *Krt17* and *Scgb3a2* in E15.5 scRNA-seq data. (C) Top 10 cluster marker list for *Krt17* cells at E15.5 based on the E15.5 scRNA-seq data. (D) The percentage of cells in G0 phase detected in Fucci mice (*Shh-Cre, Rosa<sup>H2B-EGFP/FucciG1</sup>*) significantly increased at E16.5 compared with E14.5. (E) BrdU incorporation assay with immunostaining confirmed the earlier decline of BrdU<sup>+</sup> proliferative cells in p63<sup>+</sup> cell population than p63<sup>-</sup> cell population. (F) Top10 cluster markers for the E14.5 cluster. (G) *Id* genes expression, which was calculated with E14.5 scRNA-seq dataset, was decreased in *Krt17*<sup>+</sup> cells than *Krt17*<sup>-</sup> cells at E14.5. \*  $p < 0.05$ ; Student's t test. \*\*  $p < 0.05$ ; Tukey's test.

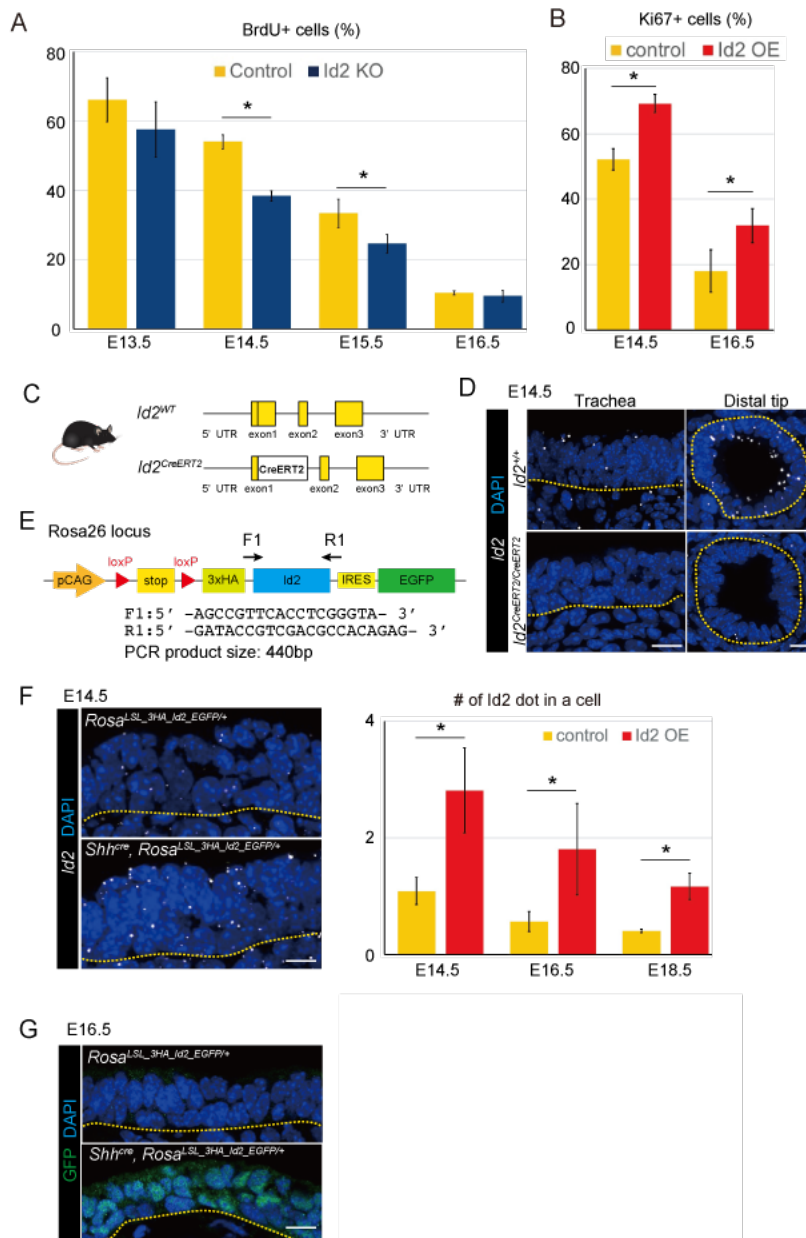

**Figure S3. Phenotypes of *Id2* knockout and overexpression mice**

(A) Time-series immunostaining analysis showed more BrdU<sup>+</sup> epithelial cells in the *Id2*<sup>+/+</sup> mice (control) than the *Id2*<sup>CreERT2/CreERT2</sup> mice (*Id2* KO mice) at E14.5 and E15.5. (B) Time-series immunostaining analysis shows fewer Ki67<sup>+</sup> epithelial cells in the *Rosa*<sup>3xHA-Id2-IRES-H2B-EGFP</sup> mice (control) than the *Shh*<sup>Cre</sup>, *Rosa*<sup>3xHA-Id2-IRES-H2B-EGFP</sup> mice (*Id2* OE) at E14.5 and E16.5. (C) Schematic summary of the *Id2* locus in the wild-type and *Id2*<sup>CreERT2/+</sup> mice. (D) *Id2* expression detected by PLISH in the trachea and distal tip epithelium at E14.5 validates the knockout of *Id2* expression in the *Id2* KO mice. (E) Inserted construct in the Rosa26 locus of the *Rosa*<sup>3xHA-Id2-IRES-H2B-EGFP</sup> mice. (F) PLISH image analysis of *Id2* expression confirmed the overexpression of *Id2* in the *Id2* OE mice. (G) GFP detection with immunostaining at E16.5 in the control and *Id2* OE mice. \* p < 0.05; Student's t test. Scale bars: 5 μm.



A

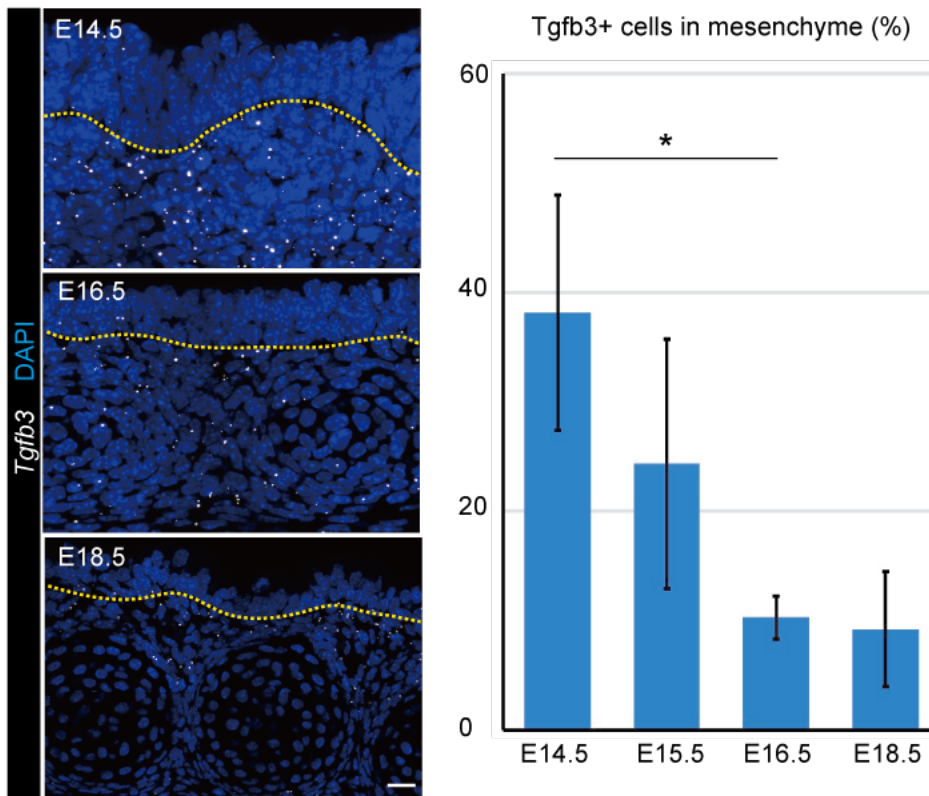

**Figure S4. *Tgfb3* expression in the developing trachea**

(A) *Tgfb3* detected by PLISH in the developing trachea from E14.5 to E18.5 confirmed that mesenchymal cells are the main source of Tgfb3 ligand during development, and their expression decreases over time.

\*  $p < 0.05$ ; Tukey's test. Scale bars: 10  $\mu\text{m}$ .

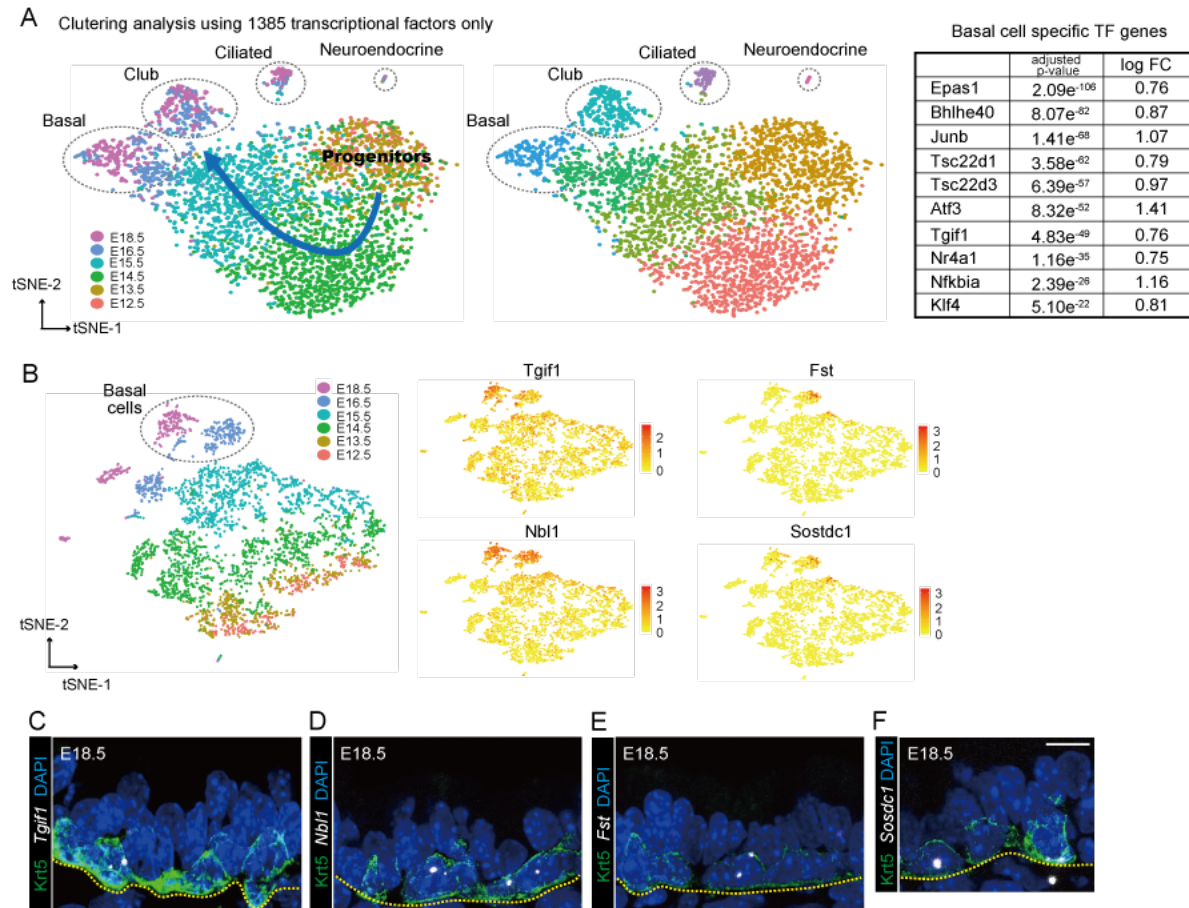

**Figure S5. Basal cell lineage-specific genes detected in the scRNA-seq dataset**

(A) The top 10 list of basal cell-specific transcription factors (TFs) detected by clustering analysis using TFs only. (B) The expression of 4 genes (*Tgif1*, *Nbl1*, *Fst*, and *Stdc1*) in the t-SNE map that are specifically expressed in basal cells in the later stage of development. The spatial expression patterns of *Tgif1* (C), *Nbl1* (D), *Fst* (E), and *Stdc1* (F) detected by PLISH. Scale bars: 5  $\mu$ m.

## 1 **STAR★METHODS**

2 Detailed methods are provided in the online version of this paper and include the  
3 following:

4 ●KEY RESOURCES TABLE

5 ●LEAD CONTACT AND MATERIALS AVAILABILITY

6 ●EXPERIMENTAL MODEL

7 ○MICE

8 ●METHOD DETAILS

9 ○BrdU-incorporation assay

10 ○Cell cycle analysis

11 ○Cell dissociation and FACS

12 ○Ex-vivo trachea culture experiment

13 ○Microscopy and imaging

14 ○Immunohistochemistry

15 ○Quantitative RT-PCR (qPCR)

- 16  Single cell RNA-seq for sequencing library construction
- 17  Single cell RNA-seq analyses
- 18  Single molecule in-situ hybridization (PLISH)
- 19  Single molecule in-situ hybridization (RNAscope)
- 20  SO<sub>2</sub> airway injury model
- 21  QUANTIFICATION AND STATISTICAL ANALYSIS
- 22  Statistical analysis
- 23  DATA AND CORE AVAILABILITY
- 24  Antibodies
- 25  Chemicals, Peptides, and Recombinant Proteins
- 26  Critical Commercial Assays
- 27  Deposited Data
- 28  Experimental Models: Organisms/Strains
- 29  Oligonucleotides
- 30  Software and Algorithms

## 31 KEY RESOURCES TABLE

| REAGENT or RESOURCE                | SOURCE                   | IDENTIFIER                                                                                                                                |
|------------------------------------|--------------------------|-------------------------------------------------------------------------------------------------------------------------------------------|
| <b>Antibodies</b>                  |                          |                                                                                                                                           |
| Chicken anti-GFP                   | Thermo Fisher Scientific | Cat# A10262,<br>RRID:AB_2534023                                                                                                           |
| Goat anti-Scgb1a1                  | Santa Cruz               | Cat# sc-9772,<br>RRID:AB_2238819                                                                                                          |
| Mouse anti-Foxj1                   | eBioscience              | Cat# 14-9965-82,<br>RRID:AB_1548835                                                                                                       |
| Mouse anti-Ki67                    | BD Biosciences           | Cat# 550609,<br>RRID:AB_393778                                                                                                            |
| Mouse anti-Krt17                   | Santa Cruz               | Cat# sc-393002,<br>RRID: N/A                                                                                                              |
| Mouse anti-p63                     | Abcam                    | Cat# ab735,<br>RRID:AB_305870                                                                                                             |
| Rabbit anti-GFP                    | MBL international        | Cat# 598,<br>RRID:AB_2313843                                                                                                              |
| Rabbit anti-Krt17                  | Abcam                    | Cat# ab53707,<br>RRID:AB_869865                                                                                                           |
| Rabbit anti-Krt5                   | Abcam                    | Cat# ab24647,<br>RRID:AB_448212                                                                                                           |
| Rabbit anti-pSmad2/3               | Cell Signaling           | Cat# 8828,<br>RRID:AB_2631089                                                                                                             |
| Rabbit anti-p75 NGF Receptor       | Abcam                    | Cat# ab8875<br>RRID:AB_306828                                                                                                             |
| Rabbit anti-Scgb3a2                | Dr. Shioko Kimura's lab  | <a href="https://ccr.cancer.gov/Laboratory-of-Metabolism/shioko-kimura">https://ccr.cancer.gov/Laboratory-of-Metabolism/shioko-kimura</a> |
| Rat anti-BrdU                      | Abcam                    | Cat# ab6326,<br>RRID:AB_2313786                                                                                                           |
| Alexa Fluor 488 Donkey anti-rabbit | Life Technology          | Cat# A-21206,<br>RRID:AB_141708                                                                                                           |
| Alexa Fluor 488 Donkey anti-rat    | Life Technology          | Cat# A-21208,<br>RRID:AB_141709                                                                                                           |
| Alexa Fluor 488 Goat anti-chicken  | Life Technology          | Cat# A-11039,<br>RRID:AB_142924                                                                                                           |
| Alexa Fluor 594 Donkey anti-goat   | Life Technology          | Cat# A-11058,<br>RRID:AB_142540                                                                                                           |
| Alexa Fluor 594 Donkey anti-mouse  | Life Technology          | Cat# A-21203,<br>RRID:AB_141633                                                                                                           |
| Alexa Fluor 594 Donkey anti-rabbit | Life Technology          | Cat# A-21207,<br>RRID:AB_141637                                                                                                           |
| Alexa Fluor 647 Donkey anti-mouse  | Life Technology          | Cat# A-31571,<br>RRID:AB_162542                                                                                                           |
| Alexa Fluor 647 Donkey anti-rabbit | Life Technology          | Cat# A-31573,<br>RRID:AB_2536183                                                                                                          |
| anti-EpCAM, APC                    | Invitrogen               | Cat# 17-5791-80,<br>RRID:AB_2734965                                                                                                       |

|                                                                         |                                           |                           |
|-------------------------------------------------------------------------|-------------------------------------------|---------------------------|
| APC Rat IgF2a, Isotype Ctrl Antibody                                    | BioLegend                                 | Cat# 400511,<br>RRID: N/A |
| BSI-B4, FITC conjugate                                                  | Sigma-Aldrich                             | Cat# L2895<br>RRID: N/A   |
| Chemicals, Peptides, and Recombinant Proteins                           |                                           |                           |
| Collagenase Type I                                                      | Worthington<br>Biochemical<br>Corporation | Cat# CLS1                 |
| 5-Bromo-2' -deoxyuridine                                                | Sigma-Aldrich                             | Cat# B5002                |
| apo-Transferrin human powder                                            | Sigma-Aldrich                             | Cat# T1147                |
| Bovine Pituitary Extract (BPE)                                          | Thermo Fisher Scientific                  | Cat# 13028014             |
| Can Get Signal® immunostain Solution B                                  | Toyobo life science                       | Cat# NKB-601              |
| Cholera toxin                                                           | Wako                                      | Cat# 030-16331            |
| Corning® Collagen type I                                                | Corning                                   | Cat# 354236               |
| Corning® Epidermal Growth Factor (EGF)                                  | Corning                                   | Cat# 354001               |
| Corning® Matrigel® Growth Factor Reduced (GFR) Basement Membrane Matrix | Corning                                   | Cat# 354230               |
| DAPI                                                                    | Nacalai                                   | Cat# 11034-56             |
| Deoxyribonuclease I                                                     | Sigma-Aldrich                             | Cat# DN25                 |
| DEPC treated-Water                                                      | Nacalai                                   | Cat# 36415-54             |
| Dispase                                                                 | Corning                                   | Cat#354235                |
| DMEM/Ham's F-12                                                         | Nacalai                                   | Cat# 11582-05             |
| DMEM/Ham's F-12 50/50 Mix                                               | Corning                                   | Cat# 15-090-CVR           |
| dNTP Mix                                                                | Invitrogen                                | Cat# 18427013             |
| EDTA (0.5M, pH 8.0)                                                     | Nippon gene                               | Cat# 311-90075            |
| Fetal Bovine Serum                                                      | Sigma-Aldrich                             | Cat# F7524                |
| Fluoromount™                                                            | Diagnostic BioSystems                     | Cat# K024                 |
| Formamide                                                               | Nacalai                                   | Cat# 16345-65             |
| Glycerol                                                                | Nacalai                                   | Cat# 17045-94             |
| Heparin sodium salt                                                     | Sigma-Aldrich                             | Cat# H3393                |
| HEPES                                                                   | Nacalai                                   | Cat# 17514-86             |
| HistoVT One                                                             | Nacalai                                   | Cat# 06380                |
| InSolution™ $\gamma$ -Secretase Inhibitor IX                            | Sigma-Aldrich                             | Cat# 565784               |
| Insulin from bovine pancreas powder                                     | Sigma-Aldrich                             | Cat# I6634                |
| NxGen® phi29 DNA Polymerase                                             | Lucigen                                   | Cat# 30221                |
| PD00332991, Cdk4/Cdk6 inhibitor                                         | Abcam                                     | Cat# ab218118             |
| Penicillin-Streptomycin Mixed Solution                                  | Nacalai                                   | Cat# 09367-34             |
| Random Primers                                                          | Invitrogen                                | Cat# 48190011             |
| RBC Lysis Buffer (10X)                                                  | BioLegend                                 | Cat# BL420301             |
| Recombinant Human TGF-beta 1                                            | R&D systems                               | Cat# 240-B                |
| Recombinant Human TGF-beta 2                                            | R&D systems                               | Cat# 302-B2               |
| Recombinant Human TGF-beta 3                                            | R&D systems                               | Cat# 243-B3               |
| RNAscope® Probe - Mm-Id2                                                | Advanced Cell<br>Diagnostics              | Cat# 445871               |
| RNAscope(R) Multiplex Fluorescent Reagent Kit v2                        | Advanced Cell<br>Diagnostics              | Cat# 323100               |
| RNaseOUT™ Recombinant Ribonuclease Inhibitor                            | Thermo Fisher Scientific                  | Cat# 10777019             |
| Sodium Chloride                                                         | Nacalai                                   | Cat# 31333-45             |
| Sodium trichloroacetate                                                 | Sigma-Aldrich                             | Cat# 190780               |
| SuperScript™ III Reverse Transcriptase                                  | Invitrogen                                | Cat# 18080                |

|                                                           |                                               |                             |
|-----------------------------------------------------------|-----------------------------------------------|-----------------------------|
| T4 DNA Ligase                                             | New England BioLabs                           | Cat# M0202T                 |
| Tamoxifen                                                 | Sigma-Aldrich                                 | Cat# T5648                  |
| TGF- $\beta$ RI Kinase Inhibitor VI, SB431542             | Sigma-Aldrich                                 | Cat# 616461                 |
| THUNDERBIRD® SYBR qPCR Mix                                | Toyobo life science                           | Cat# QPS-201                |
| Tris(hydroxymethyl)aminomethane                           | Nacalai                                       | Cat# 35434-21               |
| Trisodium Citrate Dihydrate                               | Fujifilm                                      | Cat# 204-16675              |
| TRIZOL™ Reagent                                           | Invitrogen                                    | Cat# 15596018               |
| Trypsin-EDTA (0.25%), phenol red                          | Thermo Fisher Scientific                      | Cat# 25200056               |
| Tween®20                                                  | Nacalai                                       | Cat# 28353-85               |
| UltraPure™ BSA                                            | Invitrogen                                    | Cat# AM2616                 |
| Y-27632, Dihydrochloride Salt                             | LC laboratories                               | Cat# Y-5301                 |
| <b>Critical Commercial Assays</b>                         |                                               |                             |
| Chromium Single Cell 3' Library & Gel Bead Kit v2         | 10X Genomics                                  | Cat# PN-120237              |
| Direct-zol RNA MicroPrep                                  | Zymo research                                 | Cat# R2060                  |
| RNeasy Mini Kit                                           | Qiagen                                        | Cat# 74104                  |
| SPRIselect Reagent Kit                                    | Beckman Coulter                               | Cat# B23318                 |
| VECTOR M.O.M. Immunodetection Kit                         | Vector laboratories                           | Cat# VEC-BMK-2202-1         |
| <b>Deposited Data</b>                                     |                                               |                             |
| scRNA-seq datasets                                        | This paper                                    | GSE152692                   |
| <b>Experimental Models: Organisms/Strains</b>             |                                               |                             |
| Mouse: Shh <sup>Cre</sup>                                 | Harfe BD et al. Cell. 2004.                   | JAX Stock No: 005622        |
| Mouse: Krt17 <sup>CreERT2</sup>                           | Doucet et al. Cell Rep. 2013.                 | N/A                         |
| Mouse: Id2 <sup>CreERT2</sup>                             | Rawlins EL et al. Development. 2009.          | JAX Stock No: 016222        |
| Mouse: Rosa26 <sup>mTmG</sup>                             | Muzumdar MD et al. Genesis. 2007.             | JAX Stock No: 007676        |
| Mouse: Rosa26 <sup>FucciG1</sup>                          | Abe T et al. Development. 2013.               | N/A                         |
| Mouse: Krt17 <sup>EGFP</sup>                              | Bianchi N et al. Mol Cell Biol. 2005          | JAX Stock No: 023965        |
| Mouse: N2IP::Cre                                          | Liu Z et al. Dev. Cell 2013                   | N/A                         |
| Mouse: Rosa26 <sup>L<sup>SL</sup>-Id2-IRES-H2B-EGFP</sup> | This paper                                    | N/A                         |
| Mouse: RBP <sup>j<sup>flox/flox</sup></sup>               | Tanigaki K et al. Nat Immunol. 2002.          | N/A                         |
| Mouse: Rosa26 <sup>Ai3</sup>                              | Madisen L et al. Nat Neurosci. 2010.          | JAX Stock No: 007903        |
| Mouse: Tgfb <sup>2<sup>flox/flox</sup></sup>              | Leveen P et al. Blood. 2002.                  | JAX Stock No: 012603        |
| <b>Oligonucleotides</b>                                   |                                               |                             |
| <i>Gapdh</i> for qPCR                                     | AATGTGTCCGTCGTGGATCTGA                        | GATGCCTGCTTACCACCTTCT       |
| <i>Id2</i> for qPCR                                       | GCCCAGGTGTCGTTCTCCG                           | TTCCAACGTGAGAAAGGGC<br>ACTG |
| Common Bridge for PLISH                                   | 5'<br>TCAACTCGACGTATAACATAACGA<br>CGTAAAGT 3' |                             |

|                                        |                                                                               |  |
|----------------------------------------|-------------------------------------------------------------------------------|--|
| Connector Circle for PLISH             | 5'<br>TGTTAGCGCTAACAAAATGCTGCT<br>GCTGTACTACGAACAACAATACAC<br>ATGTTACGACGT 3' |  |
| Cy5-DP5 for PLISH                      | 5' Cy5<br>AATGCTGCTGCTGTACTACGG 3'                                            |  |
| <i>Fst</i> (Right probe) for PLISH     | 5'<br>CATGGCACAACGCTGGCGTTTAT<br>ACGTCGAGTTGAACGTCGTAACA<br>3'                |  |
| <i>Fst</i> (Left probe) for PLISH      | 5'<br>TAGCGCTAACAACTTACGTCGTTA<br>TGATGTGGCATTGCACTGGCA 3'                    |  |
| <i>Id1</i> (Right probe) for PLISH     | 5'<br>AACCCCTCCCAAAGTCTCTTAT<br>ACGTCGAGTTGAACGTCGTAACA<br>3'                 |  |
| <i>Id1</i> (Left probe) for PLISH      | 5'<br>TAGCGCTAACAACTTACGTCGTTA<br>TGTGGAGGCTGAAAGGTGGAGA<br>3'                |  |
| <i>Id2</i> (Right probe) for PLISH     | 5'<br>GTCGTCCACGGGGTTTTGCTTAT<br>ACGTCGAGTTGAACGTCGTAACA<br>3'                |  |
| <i>Id2</i> (Left probe) for PLISH      | 5'<br>TAGCGCTAACAACTTACGTCGTTA<br>TGTCGGGAGATGCCCAAGCTG 3'                    |  |
| <i>Id3</i> (Right probe) for PLISH     | 5'<br>CATTCTCGGAAAAGCCAGTCTTAT<br>ACGTCGAGTTGAACGTCGTAACA<br>3'               |  |
| <i>Id3</i> (Left probe) for PLISH      | 5'<br>TAGCGCTAACAACTTACGTCGTTA<br>TGTTTTAGACTTGAGTCAGGGT 3'                   |  |
| <i>Nbl1</i> (Right probe) for PLISH    | 5'<br>TGGGACTGGAGCTTCCGACCTTA<br>TACGTCGAGTTGAACGTCGTAACA<br>3'               |  |
| <i>Nbl1</i> (Left probe) for PLISH     | 5'<br>TAGCGCTAACAACTTACGTCGTTA<br>TGCTGCAAGCGGTCTTCCAC 3'                     |  |
| <i>Sostdc1</i> (Right probe) for PLISH | 5'<br>GGATCCTCTGGGTGCGGTCTTA<br>TACGTCGAGTTGAACGTCGTAACA<br>3'                |  |
| <i>Sostdc1</i> (Left probe) for PLISH  | 5'<br>TAGCGCTAACAACTTACGTCGTTA<br>TGTTGCGTTGACACACCGCCA 3'                    |  |
| <i>Tgfb3</i> (Right probe) for PLISH   | 5'<br>AGAAGTTGGCATAGTAACCCTTAT<br>ACGTCGAGTTGAACGTCGTAACA<br>3'               |  |
| <i>Tgfb3</i> (Left probe) for PLISH    | 5'<br>TAGCGCTAACAACTTACGTCGTTA<br>TGTTAGGTTTCGTGGACCCATT 3'                   |  |
| <i>Tgif1</i> (Right probe) for PLISH   | 5'<br>CTGTAAGTTGCTGGGTGCTTAT<br>ACGTCGAGTTGAACGTCGTAACA<br>3'                 |  |
| <i>Tgif1</i> (Left probe) for PLISH    | 5'<br>TAGCGCTAACAACTTACGTCGTTA<br>TGATTTGCGGTACATCTGACT 3'                    |  |



| Software and Algorithms |              |                                                                                                                                                                     |
|-------------------------|--------------|---------------------------------------------------------------------------------------------------------------------------------------------------------------------|
| Cellranger v2.2.0       | 10x genomics | <a href="https://www.10xgenomics.com/solutions/single-cell/">https://www.10xgenomics.com/solutions/single-cell/</a>                                                 |
| CellSens Dimension2.1   |              |                                                                                                                                                                     |
| ImageJ                  | NIH          | <a href="https://imagej.net/NIH_Image">https://imagej.net/NIH_Image</a>                                                                                             |
| Monocle v2.8.0          | Github       | <a href="http://cole-trapnell-lab.github.io/monocle-release/docs/">http://cole-trapnell-lab.github.io/monocle-release/docs/</a>                                     |
| Seurat v2.3.4           | Satija Lab   | <a href="https://satijalab.org/seurat/">https://satijalab.org/seurat/</a>                                                                                           |
| ZEN2012                 | Carl Zeiss   | <a href="https://www.zeiss.com/microscopy/int/products/microscope-software/zen.html">https://www.zeiss.com/microscopy/int/products/microscope-software/zen.html</a> |

32

### 33 **LEAD CONTACT AND MATERIALS AVAILABILITY**

34 Further information and requests for resources and reagents should be directed to and will  
35 be fulfilled by the Lead Contact, Dr. Mitsuru Morimoto ([mitsuru.morimoto@riken.jp](mailto:mitsuru.morimoto@riken.jp)).

36 This study did not generate new unique reagents.

37

### 38 **EXPERIMENTAL MODEL**

#### 39 **MICE**

40 The Institutional Animal Care and Use Committee of RIKEN Kobe Branch approved all

41 the experimental procedures using animal in accordance with the ethics guidelines of the  
42 institute. All mouse strains were maintained in the RIKEN BDR animal facility in specific  
43 pathogen free (SPF) conditions.

44 See **KEY RESOURCES TABLE** for information of each mice line. To minimize tissue  
45 deformation, in all experiments, embryos were fixed in 4% paraformaldehyde/phosphate  
46 buffered saline (PBS) overnight at 4 °C or 3 hours at room temperature, and then tracheas  
47 were dissected.

#### 48 **Generation of *Rosa*<sup>CAG-LSL-3xHA-Id2-IRES-H2B-EGFP/+</sup> mice line**

49 To generate a knock-in mouse expressing 3xHA-Id2 and H2B-EGFP that was  
50 conditionally incorporated into the ROSA26 locus, Gt(ROAS)26Sor<sup>tm1CAG-LSL-3xHA-Id2-</sup>

51 IRES-H2B-EGFP (Accession No. CDB0076E:

52 <http://www2.clst.riken.jp/arg/mutant%20mice%20list.html>) mouse (Figure S3E), was

53 established with CRISPR/Cas9 genome editing technology in zygotes as described

54 previously(Abe, et al., 2020). In brief, the ROSA26 donor vector was constructed using

55 Gateway technology (Thermo Fisher Scientific). The Gateway destination vector, named

56 pR26-CAG-STOP-HR-DEST, was modified from pBigT(Srinivas, et al., 2001),

57 pCAGGS(Niwa, et al., 1991), R26-H2B-EGFP HR donor vector(Abe, et al., 2020).

58 pENTR2B-3xHA-Id2-IRES-H2B-EGFP was recloned into the destination vector using  
59 LR clonase of the Gateway technology in order to generate the donor vector. The donor  
60 vector was injected into C57BL/6 zygotes and the knock-in F0 mice were identified by  
61 PCR(Abe, et al., 2020). Genotype was determined by genetic PCR with combination of  
62 following primers; F1: 5'- AGCCGTTACCTCGGGTA-3', R1: 5'-  
63 GATACCGTCGACGCCACAGAG-3' (440bp).

64

## 65 **METHOD DETAILS**

### 66 **BrdU-incorporation assay**

67 To label almost all of proliferating cells, BrdU (0.1 mg ml<sup>-1</sup>, Sigma-Aldrich, B5002)  
68 were cumulatively injected into pregnant mice four times every 2 h before sacrifice. To  
69 measure the proliferating ratio, BrdU<sup>+</sup> cells were manually counted in the ventral  
70 epithelium between the 1st and 12th cartilage region, based on the sections  
71 immunostained for BrdU. Before E13.5, when the cartilage did not appear yet, the cells  
72 were counted in the entire region of the trachea in sagittal sections.

### 73 **Cell cycle analysis**

74 For the assessment of cell cycle status in epithelial cells in developing trachea at E14.5

75 and E16.5, Rosa<sup>FucciG1/+</sup> mice (Abe, et al., 2013) were mated with Shh<sup>Cre</sup>, Rosa<sup>H2B-EGFP/+</sup>.  
76 The developing trachea dissected from Shh<sup>Cre</sup>, Rosa<sup>H2B-EGFP/FucciG1</sup> were digested by  
77 0.25% Trypsin (Thermo Fisher Scientific, 25200056), 0.5mg/ml DNase I (Sigma-  
78 Aldrich, DN25), and 1x RBC lysis buffer (BioLegend, BL420301). The single cell  
79 suspension was obtained after passing cells through a 40 mm cell strainer. Then, the single  
80 cell suspension was sorted for selecting GFP<sup>+</sup> epithelial cells using BD FACS Aria II  
81 appliance. Based on mCherry intensity, GFP<sup>+</sup> epithelial cells were classified into three  
82 population such as mCherry<sup>negative</sup>, mCherry<sup>moderate</sup>, and mCherry<sup>high</sup> cells. We defined that  
83 mCherry<sup>moderate</sup> and mCherry<sup>high</sup> cells are in G1 and G0 phases respectively in accordance  
84 with the previous paper (Abe, et al., 2013).

### 85 **Cell dissociation and FACS**

86 To collect Krt17<sup>+</sup> and Krt17<sup>-</sup> cells using Krt17<sup>EGFP</sup> mice at E18.5, single-cell suspensions  
87 were made through the incubation of trachea with Trypsin-EDTA (0.25%) (Thermo Fisher  
88 Scientific, 25200056) at 37°C for 60 min, followed by gentle pipetting and passage  
89 through a 40 mm cell strainer. For FACS with EpCAM-APC (Invitrogen, 17-5791-80),  
90 cells were diluted to less than 1 × 10<sup>6</sup> cells/mL in PBS with 3% FBS and incubated in  
91 1:100 EpCAM-APC (Invitrogen, 17-5791-80) or 1:100 IgG-APC isotype control  
92 (BioLegend, 400511) on ice for 30 min, followed by PBS wash. Sorting was performed

93 on BD FACS Aria II and data analyzed with FACS Diva (BD Biosciences). Cells were  
94 collected in MTEC/Plus and cultured immediately or frozen for RNA extraction.

95 To prepare single-cell suspensions from adult trachea, the epithelial sheet was peeled off  
96 from mesenchymal tissue in trachea with a tungsten needle after the incubation with  
97 400U/ml collagenase type I (Worthington Biochemical Corporation, CLS1) at 37°C for  
98 60 min or 16U/ml Dispase (Corning) at 37°C for 40 min. Single-cell suspensions were  
99 made through the incubation with Trypsin-EDTA (0.25%) at 37°C for 60 min, followed  
100 by gentle pipetting, passage through a 40 mm cell strainer, and incubation in 1x RBC  
101 lysis at RT for 3 min. For FACS with EpCAM-APC, cells were diluted to less than  $1 \times 10^6$   
102 cells/mL in PBS with 3% FBS and incubated in 1:100 EpCAM-APC or 1:100 IgG-APC  
103 isotype control on ice for 30 min, followed by PBS wash. Sorting was performed on BD  
104 FACS Aria II and data analyzed with FACS Diva. Cells were collected in MTEC/Plus and  
105 cultured immediately or frozen for RNA extraction.

106 Single-cell suspensions at E18.5 and 2M for tracheosphere culture were made through  
107 the incubation of trachea with Trypsin-EDTA (0.25%) (Thermo Fisher Scientific,  
108 25200056) at 37°C for 30-60 min, followed by gentle pipetting and passage through a 40  
109 mm cell strainer. To remove the mesenchymal cells, all the cells were incubated at 37°C  
110 for 2 hours in DMEM/Ham's F-12 (Nacalai, 11582-05) with 5% FBS. Floating cells were

111 collected and used as epithelial cells for the further tracheosphere culture. The day when  
112 culture experiment started was defined as day0. 500µl MTEC/Plus was added to each  
113 well and changed at Day1, 3. 10µM Y-27632 (LC laboratories, Y-5301) was  
114 supplemented at Day0 and Day1 only. The number of spheres with the diameter over  
115 50µm per well was counted on Day4 using an inverted microscope.

116 To isolate basal cells at 2M for tracheosphere or two-dimensional culture, the epithelial  
117 sheet was peeled off from mesenchymal tissue in trachea with a tungsten needle after the  
118 incubation with 16U/ml Dispase (Corning) at 37°C for 40 min. Single-cell suspensions  
119 were made through the incubation with Trypsin-EDTA (0.25%) at 37°C for 20 min,  
120 followed by gentle pipetting, passage through a 40 mm cell strainer. For FACS, cells were  
121 diluted to less than  $1 \times 10^6$  cells/mL in PBS with 3% FBS and incubated in 1:100 EpCAM-  
122 APC and 1:200 anti-p75 NGF receptor antibody or 1:100 anti-BSI B<sub>4</sub>-FITC antibody on  
123 ice for 30 min, followed by PBS wash. In the case of anti-p75 NGF receptor antibody  
124 staining, incubation with 1:500 Alexa Fluor 488 Donkey anti-rabbit on ice for 30 min was  
125 followed. Sorting was performed on BD FACS Aria II and data analyzed with FACS Diva.  
126 Cells were collected in MTEC/Plus and cultured immediately. For tracheosphere culture,  
127  $2 \times 10^3$  basal cells were co-cultured with  $4 \times 10^4$  fibroblast cells in 25ul Growth-factor  
128 reduced Matrigel with 75ul MTEC/Plus (total 100ul/well). 500µl MTEC/Plus was added

129 to each well and changed at Day1, 3. 10 $\mu$ M Y-27632 (LC laboratories, Y-5301) was  
130 supplemented at Day0 and Day1 only. The number of spheres with the diameter over  
131 50 $\mu$ m per well was counted on Day4 using an inverted microscope. For two-dimensional  
132 culture, 1.5 $\times$ 10<sup>4</sup> basal cells in 300ul MTEC/Plus were seeded onto 24-well 0.4- $\mu$ m  
133 Transwell insert (Corning, #3470) coated with collagen type I (Corning, 354236). 0.5mL  
134 MTEC/Plus was added to the lower chamber. After 2-day culture, MTEC/Plus with Tgfb  
135 inhibitor (SB431542, 10 $\mu$ M) (Sigma-Aldrich, 616461) or Tgfb1/2/3 ligands (10ng/ml,  
136 each) (R&D systems, 240-B/302-B2/243-B3) was placed in the upper and lower  
137 chambers. After 1-day culture, the cells on the Transwell insert were soaked in 400 $\mu$ l  
138 TRIzol™ Reagent (Invitrogen, 15596018) for Quantitative RT-PCR.

139

#### 140 **Ex-vivo trachea culture experiment**

141 The developing tracheas dissected from E12.5 embryos were transferred onto the  
142 Whatman Nuclepore™ track-etched polycarbonate membrane (Whatman, 110614) and  
143 cultured at an air-liquid interface with DMEM/Ham's F-12 medium (Nacalai, 11582-05)  
144 supplemented with penicillin/streptomycin (Nacalai, 09367-34) and 5% FBS. The  
145 medium was changed every day in all experiments. The day when the ex-vivo trachea

146 culture experiment started was defined as day0. 10 $\mu$ M Y-27632 (LC laboratories, Y-5301)  
147 was supplemented at Day0 and Day1 in all experiments. To assess the effects of cell cycle  
148 status on the proliferation and differentiation processes in the tracheal epithelium, E12.5  
149 trachea was cultured in the medium supplemented with or without PD00332991 (300nM,  
150 600nM, or 900nM) (Abcam, 09367-34). At Day2, the cultured trachea was transferred  
151 into 4% PFA for 30 min at 37 °C for fixation followed by PBS wash and the overnight  
152 incubation in 30% sucrose at 4°C, and then embedded in OCT compound. To assess the  
153 effects of Tgfb signaling on the proliferation and differentiation processes in the tracheal  
154 epithelium, E12.5 trachea was cultured in the various conditions such as Tgfb inhibitor  
155 treatment (SB431542, 2 $\mu$ M) (Sigma-Aldrich, 616461) and the combination treatment of  
156 Tgfb1/2/3 ligands (10ng/ml, each) (R&D systems, 240-B/302-B2/243-B3). At Day2,  
157 samples were collected and embedded in OCT compound in the same way described  
158 above.

### 159 **Microscopy and imaging**

160 Tissue section immunofluorescence staining was imaged with LSM 710 confocal  
161 microscopy (Carl Zeiss). Cells were counted based on nuclear staining with DAPI  
162 (Nacalai, 11034-56) and specific cell markers of the respective cell types. Cells were  
163 counted in the ventral region of trachea epithelium using  $\times$ 63/1.4 NA Oil objective.



164 The tracheosphere was imaged using DP73 inverted microscopy (Olympus). Optical  
165 section images (512 x 512 to 800 x 800 pixels for the X-Y plane and 100 $\mu$ m for Z-axis  
166 step; 25-35 sections) was taken to estimate CFEs. Image processing and analyses were  
167 performed using ImageJ (NIH), ZEN2012 (Carl Zeiss), CellSens Dimension  
168 2.1(Olympus), and Adobe Illustrator (Adobe).

### 169 **Immunohistochemistry**

170 For paraffin sections, dissected tracheas were dehydrated and embedded in paraffin. For  
171 frozen sections, dissected tracheas were incubation in 30% sucrose at 4 $^{\circ}$ C overnight, and  
172 then embedded in OCT compound. 6 $\mu$ m paraffin and 9 $\mu$ m frozen sections were used for  
173 immunohistochemistry experiments. The sections were treated for epitope retrieval with  
174 HistoVT One (Nacalai, 06380) at 90  $^{\circ}$ C for 5 min or 105 $^{\circ}$ C for 15 min, permeabilized  
175 with 0.05% Tween in PBS, blocked using M.O.M. Immunodetection Kit (Vector  
176 laboratories, VEC-BMK-2202-1) for 1 hour at room temperature, then sections were  
177 incubated with primary antibodies at 4  $^{\circ}$ C for overnight. Detailed procedure and  
178 antibodies of each staining were listed below.

| <b>Antibody,<br/>Dilution</b> | <b>Company,<br/>Catalog code</b> | <b>Fixative</b> | <b>Tissue<br/>preparation</b> | <b>Antigen retrieval</b>                            | <b>Secondary<br/>antibody</b> |
|-------------------------------|----------------------------------|-----------------|-------------------------------|-----------------------------------------------------|-------------------------------|
| <b>GFP<br/>(1:400)</b>        | Thermo Fisher Scientific         | 4% PFA          | Frozen                        | 90 $^{\circ}$ C, 5 min in Histo <sup>VT</sup> One   | Chicken Alexa488              |
| <b>GFP<br/>(1:500)</b>        | MBL international                | 4% PFA          | Frozen                        | 90 $^{\circ}$ C, 5 min in Histo <sup>VT</sup> One   | Rabbit Alexa488               |
| <b>Scgb1a1</b>                | Santa Cruz                       | 4% PFA          | Paraffin                      | 105 $^{\circ}$ C, 15 min in Histo <sup>VT</sup> One | Goat Alexa594                 |

|                                    |                         |        |          |                                          |                 |  |
|------------------------------------|-------------------------|--------|----------|------------------------------------------|-----------------|--|
| <b>(1:500)</b>                     |                         |        |          |                                          |                 |  |
| <b>Foxj1</b><br><b>(1:200)</b>     | eBioscience             | 4% PFA | Paraffin | 105°C, 15 min in Histo <sup>VT</sup> One | Mouse Alexa594  |  |
| <b>Ki67</b><br><b>(1:200)</b>      | BD Biosciences          | 4% PFA | Paraffin | 105°C, 15 min in Histo <sup>VT</sup> One | Mouse Alexa594  |  |
| <b>Krt17</b><br><b>(1:400)</b>     | Santa Cruz              | 4% PFA | Paraffin | 105°C, 15 min in Histo <sup>VT</sup> One | Mouse Alexa488  |  |
| <b>Krt17</b><br><b>(1:1000)</b>    | Abcam                   | 4% PFA | Paraffin | 105°C, 15 min in Histo <sup>VT</sup> One | Rabbit Alexa488 |  |
| <b>Krt5</b><br><b>(1:1000)</b>     | Abcam                   | 4% PFA | Paraffin | 105°C, 15 min in Histo <sup>VT</sup> One | Rabbit Alexa488 |  |
| <b>pSmad2/3</b><br><b>(1:200)</b>  | Cell Signaling          | 4% PFA | Frozen   | 90°C, 5 min in Histo <sup>VT</sup> One   | Rabbit Alexa488 |  |
| <b>Scgb3a2</b><br><b>(1:1000)</b>  | Dr. Shioko Kimura's lab | 4% PFA | Paraffin | 105°C, 15 min in Histo <sup>VT</sup> One | Rabbit Alexa594 |  |
| <b>BrdU rat</b><br><b>(1:100).</b> | Abcam                   | 4% PFA | Paraffin | 105°C, 15 min in Histo <sup>VT</sup> One | Rat Alexa488    |  |
| <b>p63</b><br><b>(1:1000)</b>      | Abcam                   | 4% PFA | Paraffin | 105°C, 15 min in Histo <sup>VT</sup> One | Mouse Alexa647  |  |

179 After washing the slides with 0.05% Tween in PBS for 3 times, the sections were  
 180 incubated with secondary antibodies for 1 hour at room temperature. All of secondary  
 181 antibody conjugated with Alexa Fluor 488/594/647 (Life Technology) were used at 1:500  
 182 dilutions. Nuclei were stained with DAPI (Nacalai, 11034-56). The sections were  
 183 mounted with Fluoromount<sup>TM</sup> (Diagnostic Biosystems, K024).

184 For the detection of pSmad2/3, Can Get Signal ® immunostain Solution B (Toyobo life  
 185 science, NKB-601) was used as the solution for blocking buffer and primary/secondary  
 186 antibodies.

### 187 **Quantitative RT-PCR (qPCR)**

188 Cells isolated by FACS were centrifuged and pelleted at 400g for 6min, then soaked in  
 189 400µl TRIzol<sup>TM</sup> Reagent (Invitrogen, 15596018). Total RNA was isolated with Direct-

190 zol RNA MicroPrep (Zymoresearch, R2060) according to the manufacturer's instructions.  
191 Reverse transcription reactions were performed with SuperScript™ III Reverse  
192 Transcriptase (Invitrogen, 18080) according to the manufacturer's instructions. qRT-PCR  
193 was performed on 7500 Real-Time PCR instrument (Applied Biosystems) using  
194 THUNDERBIRD® SYBR qPCR Mix (Toyobo life science, QPS-201). The mRNA levels  
195 of target genes were normalized to the Gapdh mRNA level. Primers used for qPCR are  
196 listed in KEY RESOURCES TABLE.

#### 197 **Single cell RNA-seq for sequencing library construction**

198 To prepare single-cell suspensions of epithelial cells in 6 time points (E12.5, E13.5, E14.5,  
199 E16.5, and E18.5), the epithelial sheet was peeled off from mesenchymal tissue in  
200 developing trachea with a tungsten needle after the incubation with 175U/ml collagenase  
201 type I (Worthington Biochemical Corporation, CLS1) at 37°C for 6 - 60 min. Single-  
202 cell suspensions were made through the incubation with Trypsin-EDTA (0.25%) (Thermo  
203 Fisher Scientific, 25200056) at 37°C for 15 min, then loaded onto Chromium Single Cell  
204 A Chips (10X Genomics, PN-1000009) for the Chromium Single Cell 3' Library v2 (10X  
205 Genomics, PN-120233) according to the manufacturer's recommendations (10X  
206 Genomics). Briefly, single-cell gel bead-in-emulsions (GEMs) were generated from  
207 loaded cell suspensions by a Chromium Controller instrument (10X Genomics). After

208 performing GEM-reverse transcriptions (GEM-RTs), GEMs were harvested and the  
209 cDNAs were amplified and cleaned up with SPRIselect Reagent Kit (Beckman Coulter,  
210 B23318). Indexed sequencing libraries were constructed using Chromium Single Cell 3'  
211 Library v2 (10X Genomics, PN-120233) for enzymatic fragmentation, end-repair, A-  
212 tailing, adaptor ligation, ligation cleanup, sample index PCR, and PCR cleanup. Libraries  
213 were sequenced on a HiSeq1500 (Illumina) to obtain a sequencing depth of around 50,000  
214 reads per cells.

#### 215 **Single cell RNA-seq Analysis**

216 The packages listed below was used for processing raw sequencing data and  
217 downstream analysis; Cell Ranger version v2.2.0 (10X Genomics), Seurat version  
218 v2.3.4(Butler, et al., 2018), and Monocle v2.8.0(Qiu, et al., 2017a; Qiu, et al., 2017b;  
219 Trapnell, et al., 2014). First, the cells meeting any of the following criteria were omitted  
220 from further analyses for the quality control; <1,000 or >5,000 UMIs, > 7.5% of reads  
221 mapping to mitochondria genes, or EpCAM negative cells. For clustering, principal-  
222 component analysis was performed for dimension reduction. Top 15 principal  
223 components (PCs) were selected by using a permutation-based test implemented in  
224 Seurat and passed to t-Distributed Stochastic Neighbor Embedding (tSNE) for  
225 clustering visualization. To maintain a standard procedure for clustering, a value of 0.8

226 for the resolution was used. For the clustering analysis based on the expression of  
227 transcriptional factors, the gene list of mouse 1385 transcriptional factors derived from  
228 FANTOM5 SSTAR dataset  
229 ([https://fantom.gsc.riken.jp/5/sstar/Browse\\_Transcription\\_Factors\\_mm9](https://fantom.gsc.riken.jp/5/sstar/Browse_Transcription_Factors_mm9)) (Lizio, et al.,  
230 2015) was used. Top 15 PCs and a value of 0.8 for the resolution were used for further  
231 clustering.

232 To delineate the developmental trajectories of lung progenitors in trachea, the  
233 Monocle2 algorithm (Qiu, et al., 2017a; Qiu, et al., 2017b; Trapnell, et al., 2014) was  
234 applied to the single cell dataset. Genes to be used for dimension reduction and ordering  
235 of the cells were determined by using the differentialGeneTest function in Monocle. The  
236 genes with a q-value < 0.01 were selected, and then sorted by q-value. The ordering  
237 gene set was used to compute a pseudotime graph by using the reduceDimension  
238 function (using the DDRTree method), followed by the orderCells function. To estimate  
239 the comprehensive lineage map of the epithelial progenitors (Figure 1C), the  
240 unsupervised analysis was conducted without any specific cell markers. To estimate the  
241 developmental trajectories of Krt17+ and Krt17- progenitors (Figure 1H and 1I), first,  
242 the cells in S and G2-M phases were omitted. Then, the semi-supervised analysis was  
243 conducted based on Krt17 expression.

244 **Single molecule in-situ hybridization (PLISH)**

245 Single molecule in situ hybridization of mRNAs called PLISH (Proximity Ligation In  
246 Situ Hybridization) was performed by following the procedures described in the past  
247 paper (Nagendran, et al., 2018). Briefly, OCT-embedded, frozen 9µm tissue sections are  
248 used to hybridize with anti-sense probe pairs that anneal at adjacent positions in a tiled  
249 manner along a target transcript. After the subsequent addition of circle and bridge  
250 oligonucleotides (circle components) harboring a specific 'barcode' sequence, the nicks  
251 in the junction were sealed by ligation with T4 DNA Ligase (New England BioLabs,  
252 M0202T) to create a covalently closed circle. Using the circularized probes as a template,  
253 complementary tandem repeats were generated through rolling-circle amplification  
254 (RCA) with NxGen® phi29 DNA Polymerase (Lucigen, 30221). The single-stranded  
255 amplicons were detected with a Cy5-labeled oligonucleotide (Cy5-DP5) that is  
256 complementary to the specific 'barcode'. The sets of probe pairs, circle components, and  
257 Cy5-labeled oligonucleotide used to detect transcripts of the indicated genes are listed in  
258 KEY RESOURCES TABLE.

259 **Single molecule in-situ hybridization (RNAscope)**

260 Single molecule in situ hybridization of mRNAs called RNAscope was performed by

261 following the manufacturer's instructions. Briefly, OCT-embedded, frozen 9µm tissue  
262 sections are used to hybridize with the proprietary probes for *Id2* RNA using RNAscope  
263 Multiplex Fluorescent Reagent Kit v2 (Advanced Cell Diagnostics).

#### 264 **SO<sub>2</sub> airway injury model**

265 SO<sub>2</sub> injury models have been previously described (Pardo-Saganta, et al., 2015; Rawlins,  
266 et al., 2007; Borthwick, et al., 2001). Briefly, 8-16 weeks old male mice were exposed to  
267 700 ppm SO<sub>2</sub> for 4 hours. Age-matched mice were used for both control and mutant mice  
268 (*Shh<sup>Cre</sup>, Rosa<sup>3xHA-Id2-IRES-H2B-EGFP</sup>* mice; *Id2* OE or *Shh<sup>Cre</sup>, Tgfb2<sup>flox/flox</sup>* mice; *Tgfb2*  
269 *cKO*). Mouse tracheas were collected 12, 18, 24, 48, 72, and 120 hours after injury. 3-4  
270 tracheas at each time point were analyzed.

#### 271 **STATISTICAL ANALYSIS**

272 Statistical analyses were performed with Microsoft Excel for Mac. For paired  
273 comparisons, statistical significance was determined by Student's t-test. For multiple  
274 comparisons, statistical significance was determined by Tukey's method.

275

#### 276 **DATA AND CORE AVAILABILITY**

277 The scRNA-seq datasets in this paper is accessible at GSE152692. Token is  
278 itulegeotkzxt. (<https://www.ncbi.nlm.nih.gov/geo/query/acc.cgi?acc=GSE152692>)

279

## 280 References

- 281 **Abe, T., Inoue, K.I., Furuta, Y., and Kiyonari, H. (2020). Pronuclear Microinjection during S-Phase Increases**  
282 **the Efficiency of CRISPR-Cas9-Assisted Knockin of Large DNA Donors in Mouse Zygotes. Cell Rep 31, 107653.**
- 283 **Abe, T., Sakaue-Sawano, A., Kiyonari, H., Shioi, G., Inoue, K., Horiuchi, T., Nakao, K., Miyawaki, A., Aizawa,**  
284 **S., and Fujimori, T. (2013). Visualization of cell cycle in mouse embryos with Fucci2 reporter directed by**  
285 **Rosa26 promoter. Development 140, 237-46.**
- 286 **Borthwick, D.W., Shahbazian, M., Krantz, Q.T., Dorin, J.R., and Randell, S.H. (2001). Evidence for stem-cell**  
287 **niches in the tracheal epithelium. Am J Respir Cell Mol Biol 24, 662-70.**
- 288 **Butler, A., Hoffman, P., Smibert, P., Papalexi, E., and Satija, R. (2018). Integrating single-cell transcriptomic**  
289 **data across different conditions, technologies, and species. Nat Biotechnol 36, 411-420.**
- 290 **Lizio, M., Harshbarger, J., Shimoji, H., Severin, J., Kasukawa, T., Sahin, S., Abugessaisa, I., Fukuda, S., Hori,**  
291 **F., Ishikawa-Kato, S., et al. (2015). Gateways to the FANTOM5 promoter level mammalian expression atlas.**  
292 **Genome Biol 16, 22.**
- 293 **Nagendran, M., Riordan, D.P., Harbury, P.B., and Desai, T.J. (2018). Automated cell-type classification in intact**  
294 **tissues by single-cell molecular profiling. Elife 7.**
- 295 **Niwa, H., Yamamura, K., and Miyazaki, J. (1991). Efficient selection for high-expression transfectants with a**  
296 **novel eukaryotic vector. Gene 108, 193-9.**
- 297 **Pardo-Saganta, A., Law, B.M., Tata, P.R., Villoria, J., Saez, B., Mou, H., Zhao, R., and Rajagopal, J. (2015).**  
298 **Injury induces direct lineage segregation of functionally distinct airway basal stem/progenitor cell**  
299 **subpopulations. Cell Stem Cell 16, 184-97.**
- 300 **Qiu, X., Hill, A., Packer, J., Lin, D., Ma, Y.A., and Trapnell, C. (2017a). Single-cell mRNA quantification and**  
301 **differential analysis with Census. Nat Methods 14, 309-315.**
- 302 **Qiu, X., Mao, Q., Tang, Y., Wang, L., Chawla, R., Pliner, H.A., and Trapnell, C. (2017b). Reversed graph**  
303 **embedding resolves complex single-cell trajectories. Nat Methods 14, 979-982.**
- 304 **Rawlins, E.L., Ostrowski, L.E., Randell, S.H., and Hogan, B.L. (2007). Lung development and repair:**  
305 **contribution of the ciliated lineage. Proc Natl Acad Sci U S A 104, 410-7.**
- 306 **Srinivas, S., Watanabe, T., Lin, C.S., William, C.M., Tanabe, Y., Jessell, T.M., and Costantini, F. (2001). Cre**  
307 **reporter strains produced by targeted insertion of EYFP and ECFP into the ROSA26 locus. BMC Dev Biol 1, 4.**



308 **Trapnell, C., Cacchiarelli, D., Grimsby, J., Pokharel, P., Li, S., Morse, M., Lennon, N.J., Livak, K.J., Mikkelsen,**  
309 **T.S., and Rinn, J.L. (2014). The dynamics and regulators of cell fate decisions are revealed by pseudotemporal**  
310 **ordering of single cells. Nat Biotechnol 32, 381-386.**

311
